# Supplementary material for: Intramolecular CH⋯π attraction mediated conformational polymorphism of constrained helical peptides
Source: Royal Society of Chemistry journal article supplement (doi:10.1039/d4sc02545h), 2024-01-01
Supplement: d4sc02545h1.pdf [file d4sc02545h1.pdf]

## Supporting Information

### Intramolecular CH... $\pi$ attraction mediated conformational polymorphism of constraint helical peptides

Jinming Sun,<sup>a, ‡</sup> Zi-You Tian,<sup>a, ‡</sup> Jianbo Liu,<sup>b, ‡</sup> Chuan Wan,<sup>d</sup> Chuan Dai,<sup>b</sup> Zhihong Liu,<sup>b</sup> Yun Xing,<sup>a</sup> Yujie Wu,<sup>e</sup> Zhanfeng Hou,<sup>a</sup> Wei Han,<sup>c</sup> Feng Yin,<sup>a, b\*</sup> Yuxin Ye,<sup>b\*</sup> Zigang Li<sup>a, b\*</sup>

#### Contents

|                                                                                                                                                                 |    |
|-----------------------------------------------------------------------------------------------------------------------------------------------------------------|----|
| 1. Materials and methods .....                                                                                                                                  | 2  |
| 2. Synthesis of peptides .....                                                                                                                                  | 4  |
| 2.1 Fmoc-S5 unnatural amino acid synthesis. ....                                                                                                                | 4  |
| 2.2 NMR spectral data of Fmoc-S5 unnatural amino acid.....                                                                                                      | 5  |
| 2.3 Solid-phase peptide synthesis.....                                                                                                                          | 6  |
| 2.4 HPLC and MS spectral data of CIH peptides.....                                                                                                              | 7  |
| 2.5 CD spectral data of CIH peptides .....                                                                                                                      | 10 |
| 3. Polymorphs characterization of the CIH <sup>AAIa</sup> .....                                                                                                 | 11 |
| 3.1 Optical microscope images for CIH <sup>AAIa</sup> self-assembly process.....                                                                                | 11 |
| 3.2 Crystal packing of CIH <sup>AAIa</sup> .....                                                                                                                | 12 |
| 4. DFT calculation.....                                                                                                                                         | 14 |
| 4.1 Benchmark calculation of CIH <sup>AAIa</sup> .....                                                                                                          | 14 |
| 4.2 DFT analyses of CIH <sup>AAL</sup> .....                                                                                                                    | 16 |
| 4.3 AIM analyses.....                                                                                                                                           | 18 |
| 4.4 Thermodynamic correction with temperature elevation .....                                                                                                   | 19 |
| 5. Crystal data .....                                                                                                                                           | 20 |
| 6. Crystal structures of the CIH <sup>AAV</sup> and CIH <sup>AAL</sup> .....                                                                                    | 22 |
| 6.1 X-ray structure superpositions of CIH <sup>AAIa</sup> (conformer-1) / CIH <sup>AAV</sup> , and CIH <sup>AAIa</sup> (conformer-2) / CIH <sup>AAL</sup> ..... | 22 |
| 6.2 Crystal packing of CIH <sup>AAV</sup> and CIH <sup>AAL</sup> .....                                                                                          | 23 |
| 6.3 Temperature-dependent CD of CIH <sup>AAV</sup> and CIH <sup>AAL</sup> .....                                                                                 | 23 |
| 7. Cartesian Coordinates and Energy of Stationary Points .....                                                                                                  | 25 |
| 7.1 Energy data summary.....                                                                                                                                    | 25 |
| 7.2 Coordinates .....                                                                                                                                           | 26 |
| References .....                                                                                                                                                | 47 |

## 1. Materials and methods

**General:** All chemicals and solvents were purchased from commercial suppliers and used without further purification. The  $^1\text{H}$  NMR spectra were recorded with a Zhongke-Niujiu AS400 400 MHz spectrometer in MeOD at 298K and calibrated against the residual proton signal or natural abundance carbon resonance of the used deuterated solvent from tetramethylsilane (TMS) as the internal standard. Peptides were analyzed and purified by RP-HPLC (SHIMAZU Prominence LC-20AT) using a  $\text{C}_{18}$  analytic column (Agilent ZORBAX SB-Aq,  $4.6 \times 250$  mm,  $5 \mu\text{m}$ , flow rate 0.8 mL/min).  $\text{H}_2\text{O}$  (containing 0.1% TFA) and pure acetonitrile were utilized as solvents in linear gradient mixtures. LC-MS spectra were carried out on SHIMAZU LC-MS 8030 (Electrospray Ionization).

**Preparation of peptide assemblies:** Lyophilized pentapeptide powder was dissolved in deionized water and diluted to the 5-millimole concentration. Preheat the water bath to the target temperature in advance, take an appropriate amount of peptide solution (about 150  $\mu\text{L}$ ) in a 2 ml glass bottle, and seal the bottle with Teflon tape, which was heated in a water bath for at least four hours, then naturally cooled to room temperature about 0.2K/min.

**Circular Dichroism (CD) Spectroscopy:** CD spectra were recorded by Chirascan Plus Circular Dichroism Spectrometer (Applied Photophysics) at the preset temperature level. Peptides were dissolved in deionized water at 100 micromole concentration. Parameters used in the experiment are as follows: wavelengths from 250 to 190 nm were measured with a resolution of 1.5 nm at a scan speed of 1 nm/sec. Each sample was scanned twice and the averaged spectrum was smoothed using Pro-Data Viewer by Applied Photophysics with a smooth window. CD data were presented as mean residual ellipticity  $[\theta]$  in  $\text{deg}\cdot\text{cm}^2\cdot\text{dmol}^{-1}$ .

**Scanning Electron Microscopy (SEM):** The samples (20  $\mu\text{L}$ ) of peptide assemblies were placed on polished silicon slides and stood for 10 minutes before removing the remaining solvent, then were viewed using a scanning electron microscope (ZEISS Supra 55, Oxford X-Max 20, 5 kV).

**Atomic Force Microscope (AFM):** Samples of peptide assemblies were diluted five times with deionized water before 5  $\mu\text{L}$  liquid was dispersed on Mica flakes. After adsorption on mica flakes for 30 minutes, the remaining solvent was removed and then dried in the oven at 398 K. The samples were then characterized by Bruker Dimension Icon atomic force microscope, and AFM analysis was performed in AFM, Bruker, and Multimode 8 modes. The probe material used by AFM is an antimony-doped silicon cantilever with a spring constant of 0.4 N/m and a resonance frequency of 300 kHz. The acquired image data is analyzed using nasoscope analysis.

**Single Crystal X-ray diffraction (SCXRD):** The crystals were quick-frozen with liquid nitrogen and protected with 30% glycerin. The selected crystals are collected under 100K, and the collection device is an indoor X-ray diffraction system. The system parameters are as follows: high-strength sealed copper tube X-ray generator (Rigaku<sup>®</sup> MicroMax-002<sup>+</sup>), an AFC<sup>11</sup> goniometer, a Saturn 944<sup>+</sup> CCD detector (Rigaku<sup>®</sup>), and an Oxford refrigeration system. Diffraction data collection, integration, scaling, and empirical correction are

completed through the Rigaku CrystalClear-2.054 program package. The resolution of the crystal obtained by the software SIR201155 is 0.8Å and the structure is refined by the SHELXTL97 software using Full-Matrix-Least-Squares against  $F^2$ . Non-hydrogen atoms are defined as anisotropy, and hydrogen atoms are placed in the most ideal position. The absolute configuration of the crystal is determined using the Flack method.

**Power X-ray diffraction (PXRD):** The crystals were mounted vertically onto the goniometer of a Bruker Instruments Gemini X-ray diffractometer equipped with a Sapphire 3 charge-coupled device (CCD) detector. The sample-to-detector distance was 15mm. Jade 6 software was used to study the peptide structures of the samples. The sample powders were scanned in the range of  $2\theta = 5^\circ$  to  $30^\circ$  with a step size of  $0.15^\circ$ .

## 2. Synthesis of peptides

### 2.1 Fmoc-S5 unnatural amino acid synthesis.

The unnatural amino acid (S5) was synthesized based on the previous literature,<sup>1</sup> as shown in following flow chart scheme.

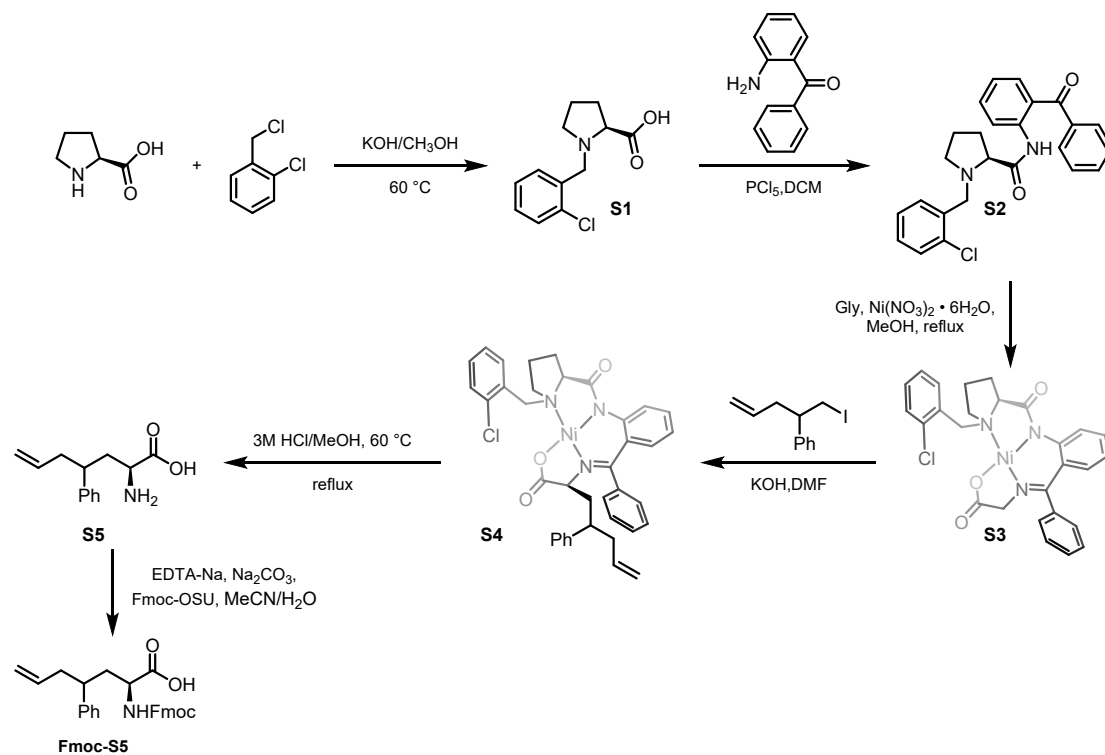

## 2.2 NMR spectral data of Fmoc-S5 unnatural amino acid

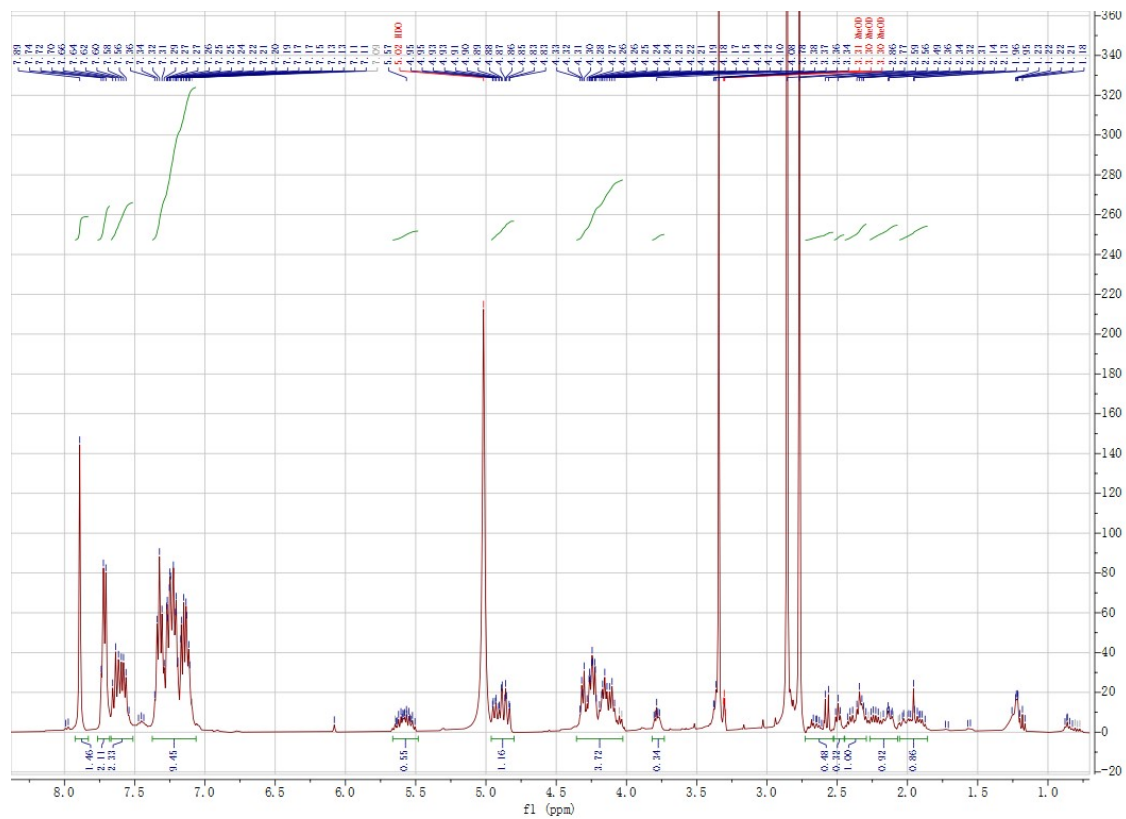

### 2.3 Solid-phase peptide synthesis.

All peptides were synthesized by manual Fmoc-based solid-phase synthesis, as shown in following scheme. Intramolecular thiol-ene reactions were used for constructing target cyclic peptides. The thiol-ene reaction is conducted at ultraviolet light (365 nm) with 3 eq MAP/MMP (1:1) catalysis in dry DMF for 4 hours. The photoreaction efficiency is generally >90% for pentapeptides. The resulting cyclic diastereomers were separated by HPLC. The purified peptides were tested by ESI/LC-MS and the pure fractions were combined and then lyophilized.

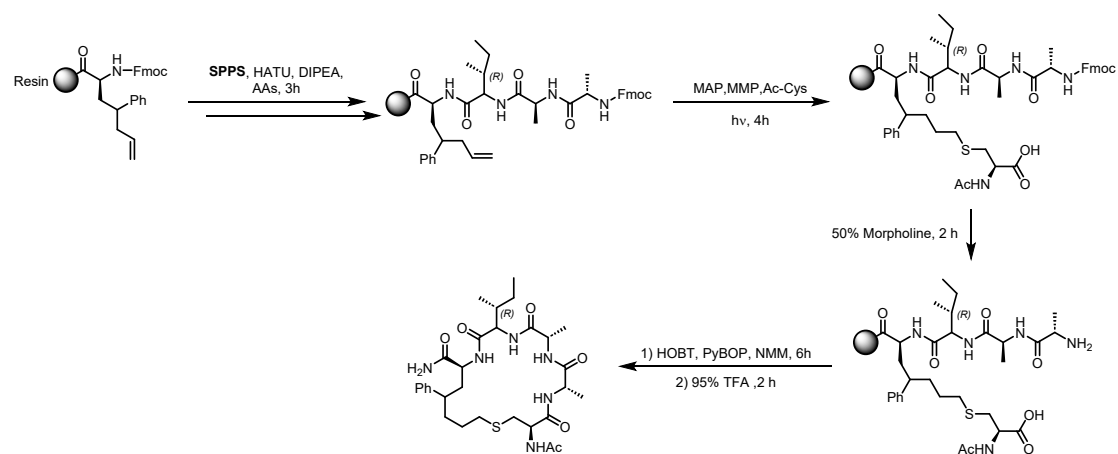

(MAP:4-methoxy acetophenone, MMP: 2-hydroxy-4'-(2-hydroxyethoxy)-2-methylpropiophenone, AC-Cys: Acetylcysteine, DIPEA: N, N-diisopropylethylamine, PyBOP: Benzotriazol-1-yl-oxytripyrrolidino-phosphonium Hexafluorophosphate, HOBT: 1-Hydroxybenzotriazole.

## 2.4 HPLC and MS spectral data of CIH peptides

The resulting HPLC and ESI/LC-MS spectral were showed as following. The calculated and found  $m/z$  ( $[M+H]^+/[M+Na]^+$ ), the HPLC spectra (line 220 nm), retention time  $T_R$  are presented.

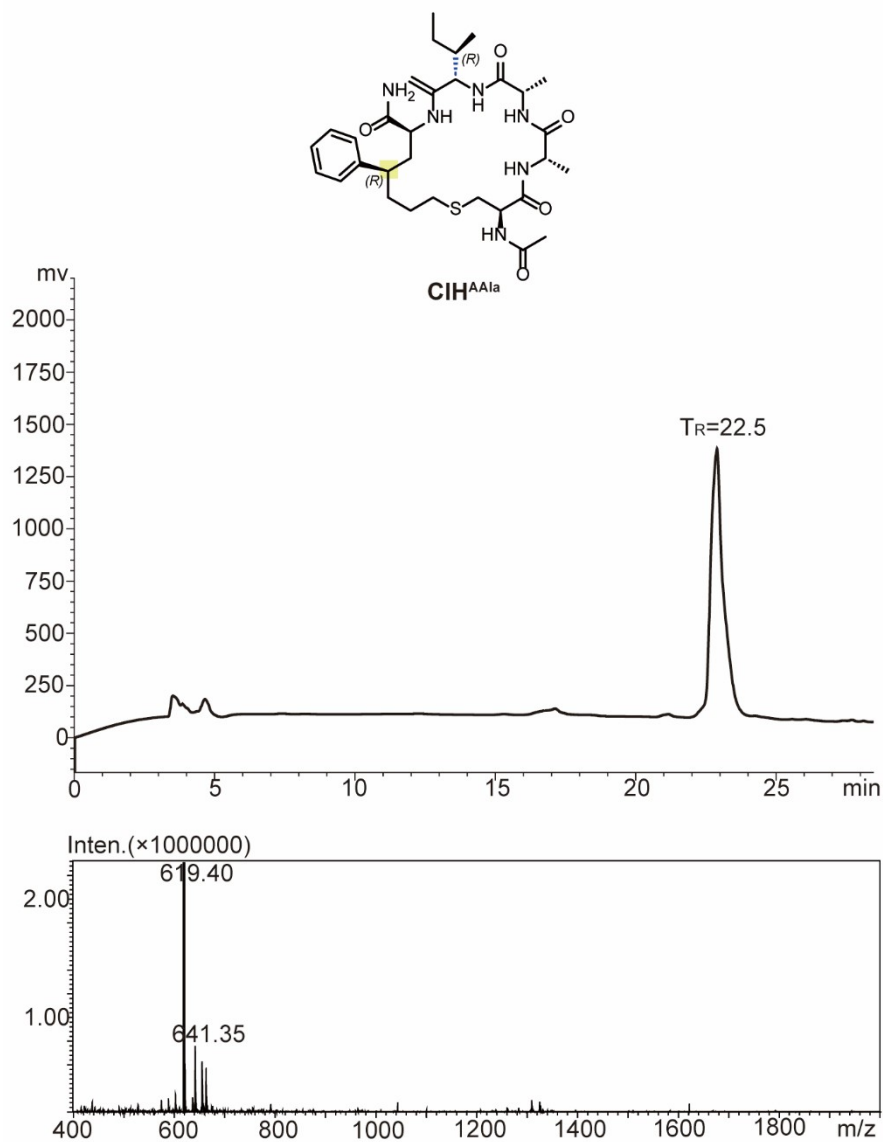





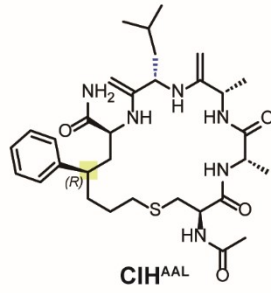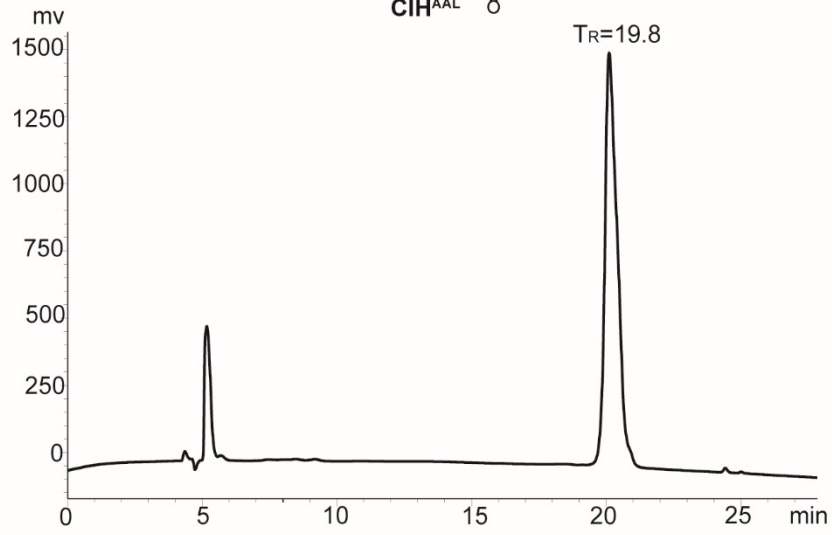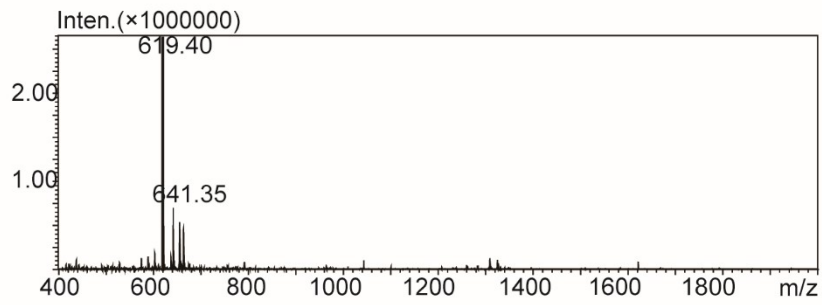

## 2.5 CD spectral data of CIH peptides

The CIH peptides were characterized by CD spectral, the results were showed as following.

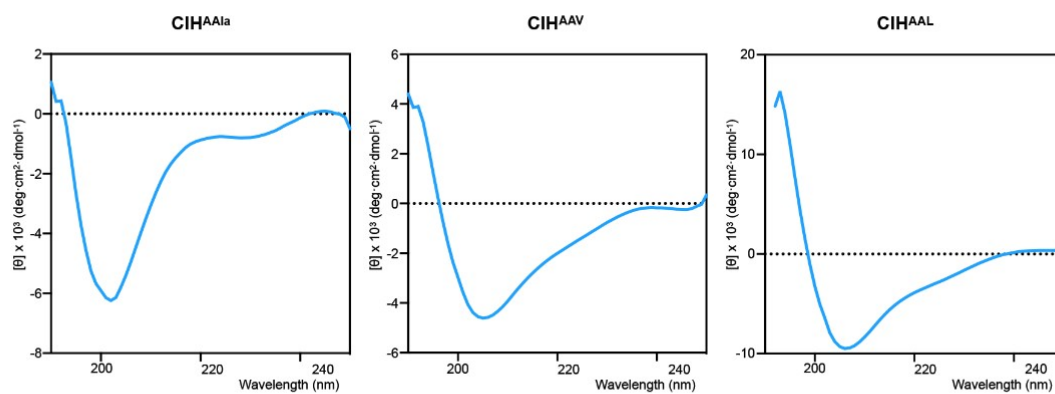

**Figure S1.** CD spectra of CIH peptides in ddH<sub>2</sub>O at room temperature.

### 3. Polymorphs characterization of the CIH<sup>AAIa</sup>

#### 3.1 Optical microscope images for CIH<sup>AAIa</sup> self-assembly process

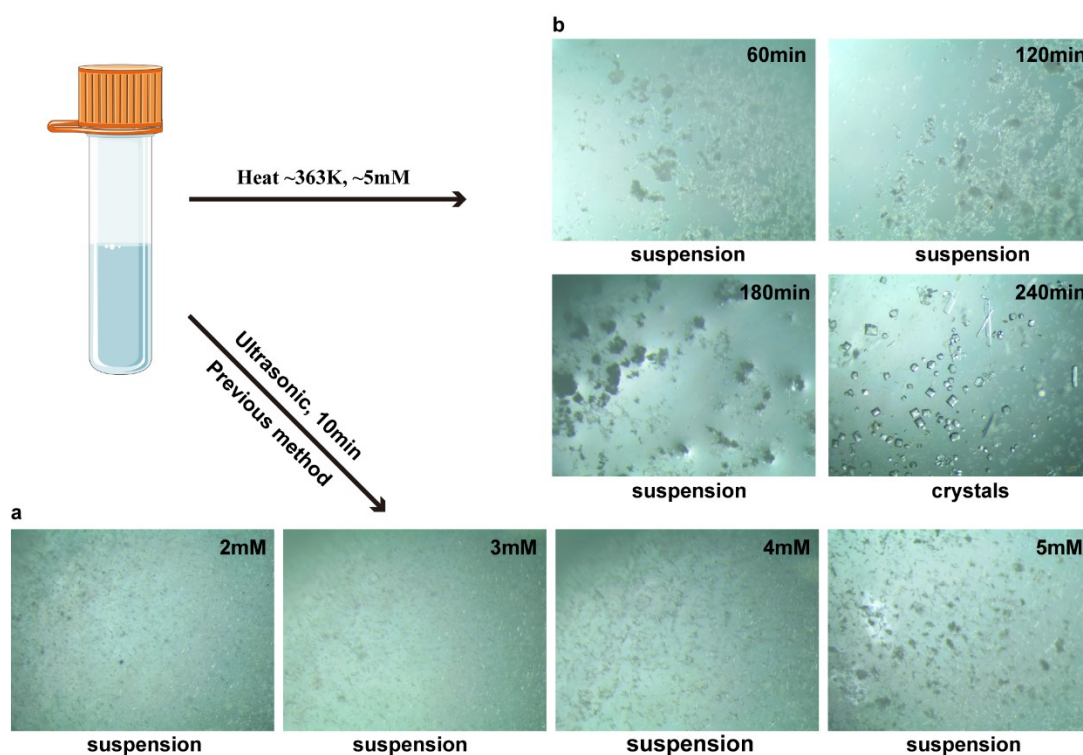

**Figure S2.** The self-assembly results of CIH<sup>AAIa</sup> by two different methods. (a) the peptide was dissolved in double distilled water as a reserve liquid about 5mM. Different morphologies of the peptides after annealing at different heating times were presented. Obvious crystals appeared after 240 minutes of heating durations. (b) the peptide was dissolved in different concentration. No obvious crystals appeared after 10 minutes ultrasonic.

### 3.2 Crystal packing of CIH<sup>Ala</sup>

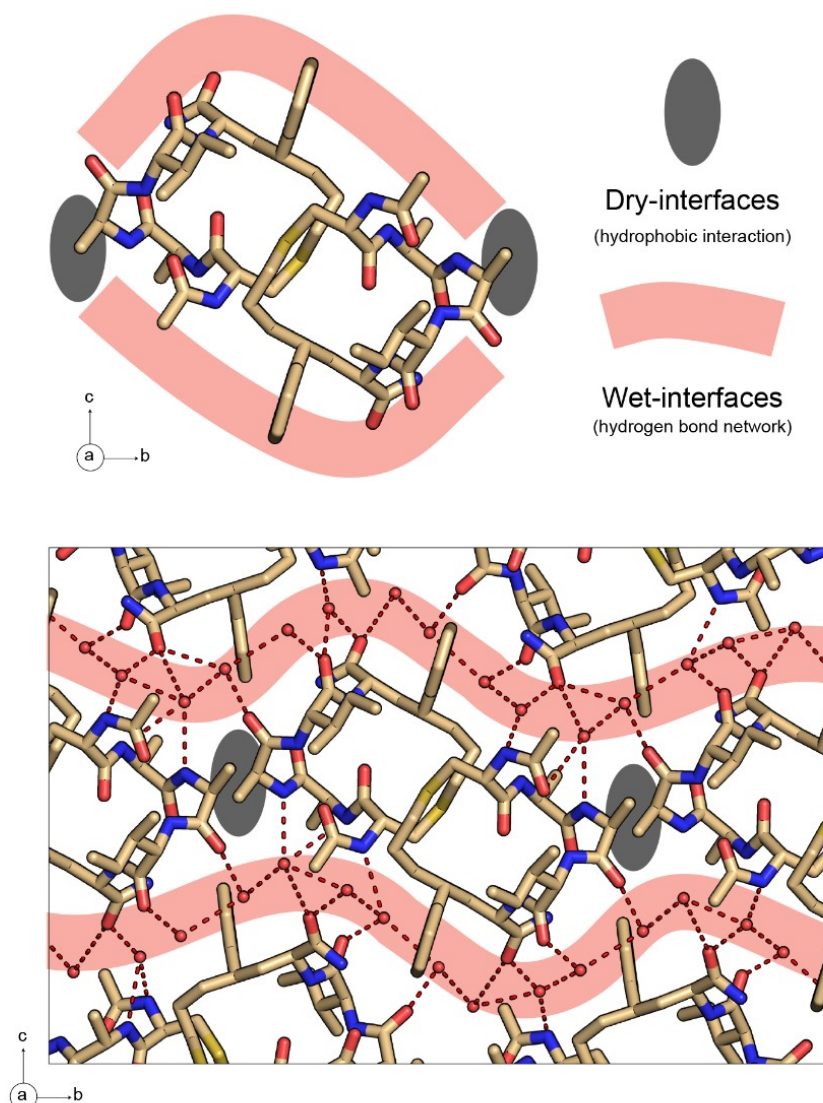

**Figure S3.** The dry-interface and wet-interface of CIH<sup>Ala</sup> cuboid column in polymorph- $\alpha$ . The wet interface constitutes the major portion of the column interface, primarily formed by a hydrogen bond network between solvent water molecules and the peptide. The dry interface at the column's corners is relatively small and primarily stems from the hydrophobic interactions along the b-axis contributed by the methyl group of the third alanine residue's side chain.

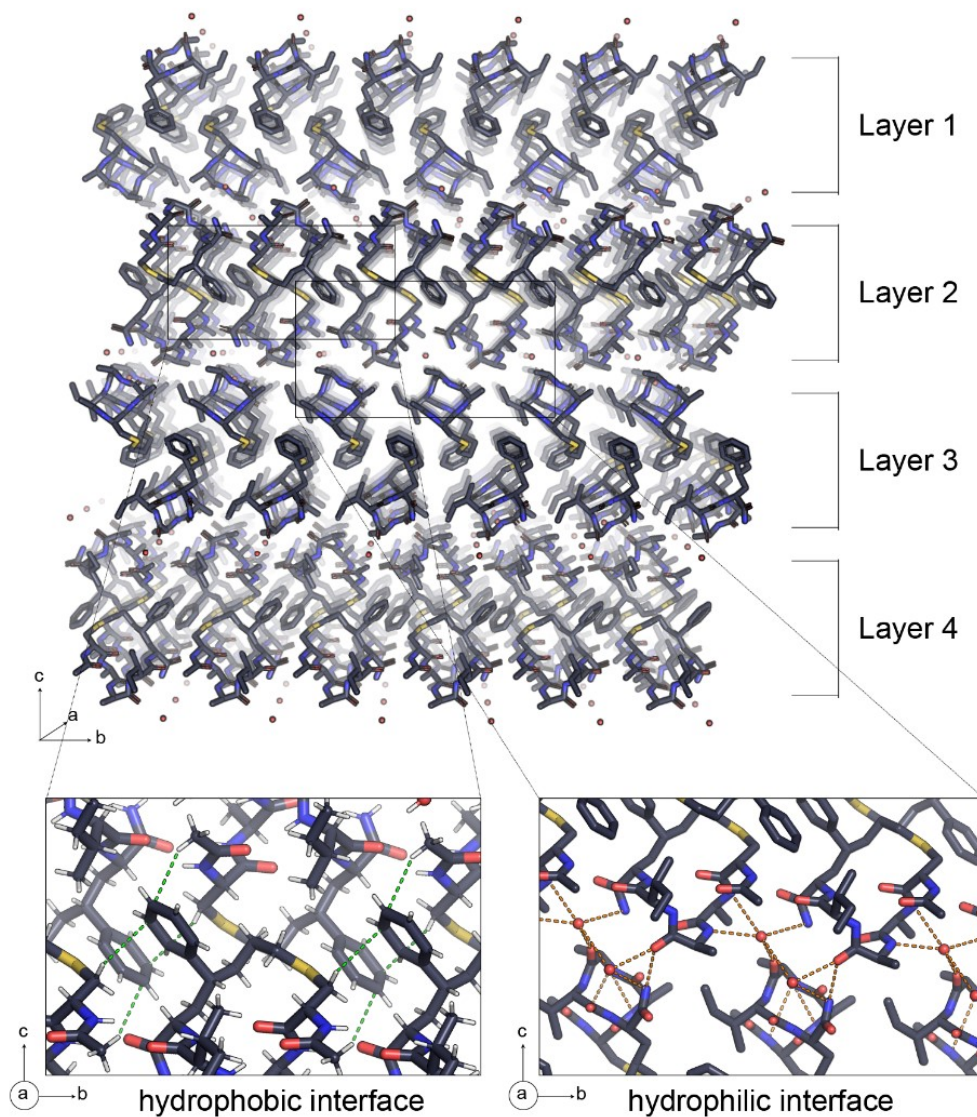

**Figure S4.** The crystal packing mode of **CIHAAIa** in polymorph- $\beta$ . The helical columns stack into 2D layers through the zipper-type hydrophobic interaction along the a- and b- axis, and the layers further stack along the c-axis through hydrogen bonds networks. The magnified view of hydrophobic-interface and hydrophilic-interface were showed in bottom frames. The intramolecular C-H... $\pi$  interactions formed between the benzene ring with the neighboring linker regions and acetyl groups were showed by green dashes. The hydrogen bonds between hydrophilic interface and solvent water molecule were showed by orange dashes.

## 4. DFT calculation

The DFT calculation was performed in Gaussian 09 program. Becke3LYP functional with dispersion correction was used to locate all the stationary points and frequency analysis was executed in the aqueous phase with 6-311G\* basis set. The thermodynamics correction with temperature was also employed to discuss the Gibbs free energy in 1 M concentration. Specifically, high accuracy single point energy calculation was performed at M06-2X/def2-TZVPP level in aqueous phase and the ultrafine integrated grid was used and discussed in SI to validate the result based on the Becke3LYP level. The IRC calculation was executed to confirm the transition state. The wavefunction analysis with AIM was conducted by Multiwfn software to confirm the CH... $\pi$  interaction. The 3D molecular graphs were presented by CYLview and VMD software.

### 4.1 Benchmark calculation of CIH<sup>AAIa</sup>

The simple benchmark calculation was employed to validate whether the calculated aqueous structure was consistent with the X-ray structure. We chose the CIH<sup>AAIa</sup> X-ray structure as the standard and focused on the C...H distance to confirm that the functional and basis set was adequate (as following table).

Distance of C...H in X-ray structure and calculated data

|                                              |                            |
|----------------------------------------------|----------------------------|
| Crystal of isoleucine                        | 2.88 Å (Distance of C...H) |
| B3LYP-D3(BJ)(SMD, H <sub>2</sub> O)/6-311G*  | 2.80 Å                     |
| B3LYP(SMD, H <sub>2</sub> O)/6-311G**        | 3.23 Å                     |
| B3LYP(SMD, H <sub>2</sub> O)/6-31+G**        | 3.23 Å                     |
| B3LYP-D3(BJ)(SMD, H <sub>2</sub> O)/6-31+G** | 2.80 Å                     |

The combination with B3LYP-D3(BJ)/6-311G\* and B3LYP-D3(BJ)/6-311+G\*\* in aqueous phase provided adequate calculated structure with X-ray result (benchmark DFT calculation of CIH<sup>AAIa</sup> is shown as following figure,), in which the C...H distances were all 2.80 Å that were in agreement with 2.88 Å in X-ray's. However, the C...H distance without dispersion correction was prolonged all to 3.23 Å, demonstrating the weak CH... $\pi$  interaction lost. The effect of basis set considering the diffuse functions was subtle, underlying that the DFT study could be employed in high efficiency with simple 6-311G\*. Ultimately, the B3LYP-D3(BJ) functional and 6-311G\* basis set was used.

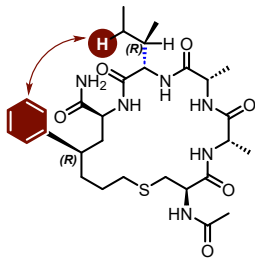

CIH<sup>AAIa</sup>

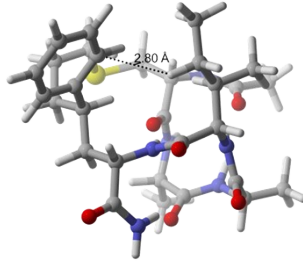

B3LYP-D3(BJ)(SMD, H<sub>2</sub>O)/6-311G\*

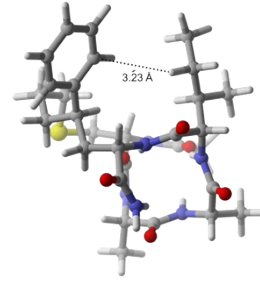

B3LYP(SMD, H<sub>2</sub>O)/6-311G\*\*

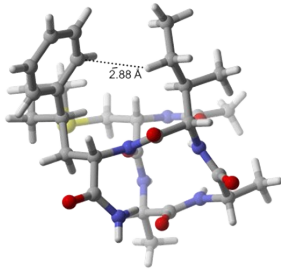

Crystal of CIH<sup>AAIa</sup>

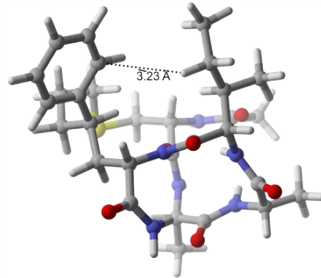

B3LYP(SMD, H<sub>2</sub>O)/6-31+G\*\*

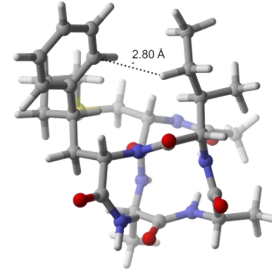

B3LYP-D3(BJ)(SMD, H<sub>2</sub>O)/6-31+G\*\*

## 4.2 DFT analyses of CIH<sup>AAL</sup>

For the leucine side chain in **CIH<sup>AAL</sup>** case, it is vital to demonstrate that the error was induced by the dispersion correction compared with related X-ray structure. The H...H distance was 4.6 Å in X-ray structure but decreased to 2.3 Å in calculated one. The inferior distance offered imposed dispersion interaction, generating crucial Gibbs free energy gap error. The simulation of Leucine side chain case was distinct from previous examples (as following figure).

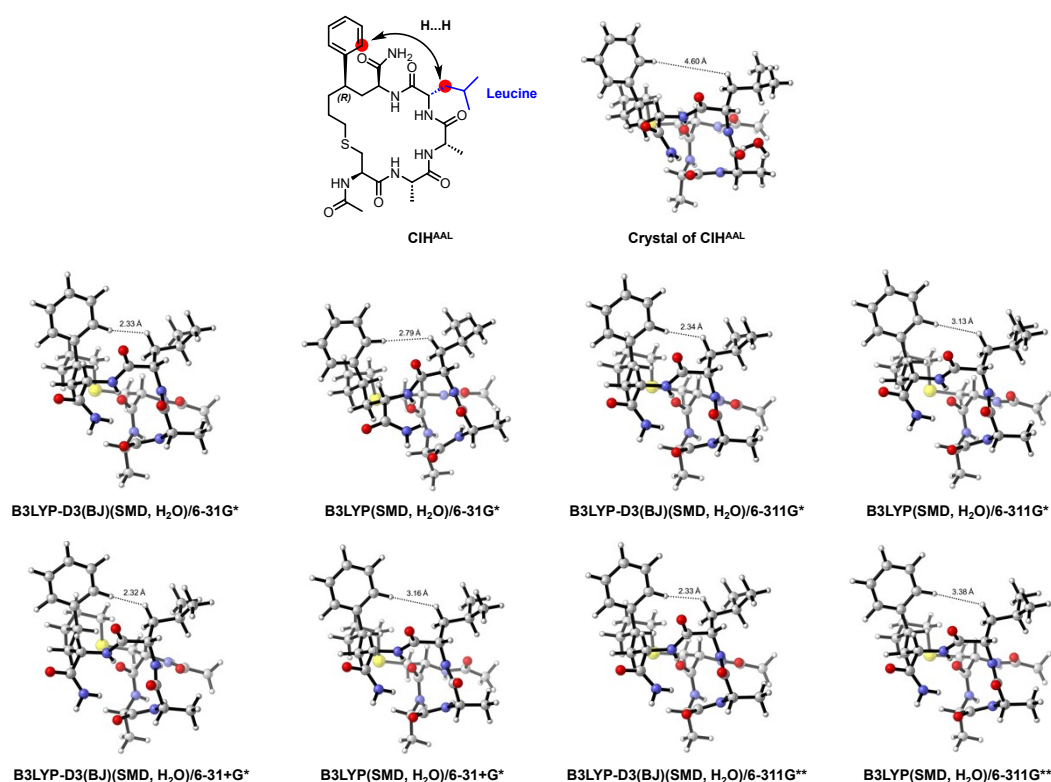

We found that once the DFT functional was corrected with dispersion, the H...H distance we focused on was evidently shorter than the crystal one, implying that the overestimated dispersion interaction in another conformation (as following table). The calculation without the dispersion correction provided the consistent result with experiment. Meanwhile, the screening of the combination with dispersion and basis set revealed that the basis set has subtle effect compared with dispersion correction.

DFT benchmark calculation for leucine case

|                                             | $\Delta G/(\text{kcal/mol})$ |     |     | <i>High accuracy</i><br>$\Delta G^\ddagger/(\text{kcal/mol})$ |     |      |
|---------------------------------------------|------------------------------|-----|-----|---------------------------------------------------------------|-----|------|
|                                             | L1                           | L2  | L3  | L1                                                            | L2  | L3   |
| B3LYP-D3(BJ)(SMD, H <sub>2</sub> O)/6-31G*  | 0.0                          | 2.6 | 0.6 | 0.0                                                           | 1.5 | 0.1  |
| B3LYP(SMD, H <sub>2</sub> O)/6-31G*         | 0.0                          | 2.9 | 1.3 | 0.0                                                           | 2.9 | 0.8  |
| B3LYP-D3(BJ)(SMD, H <sub>2</sub> O)/6-31+G* | 0.0                          | 2.8 | 0.4 | 0.0                                                           | 1.8 | -0.2 |
| B3LYP(SMD, H <sub>2</sub> O)/6-31+G*        | 0.0                          | 4.9 | 1.7 | 0.0                                                           | 3.8 | 1.3  |
| B3LYP-D3(BJ)(SMD, H <sub>2</sub> O)/6-311G* | 0.0                          | 1.7 | 0.4 | 0.0                                                           | 0.4 | -0.1 |
| B3LYP(SMD, H <sub>2</sub> O)/6-311G*        | 0.0                          | 4.3 | 2.6 | 0.0                                                           | 4.0 | 1.7  |



|                                              |     |     |     |     |     |      |
|----------------------------------------------|-----|-----|-----|-----|-----|------|
| B3LYP-D3(BJ)(SMD, H <sub>2</sub> O)/6-311G** | 0.0 | 1.9 | 0.5 | 0.0 | 0.6 | -0.2 |
| B3LYP(SMD, H <sub>2</sub> O)/6-311G**        | 0.0 | 3.4 | 2.4 | 0.0 | 2.9 | 1.0  |

#: High accuracy Gibbs energy was obtained with M06-2X(SMD, H<sub>2</sub>O)/def2-TZVPP single point energy level

### 4.3 AIM analyses

Atoms in molecules analyses for X-ray structure conformer-**1** and calculated **iL1** structure were executed in **Figure S5**. The bond critical point (CP) at conformer **1** revealed that there existed a weak CH... $\pi$  interaction between H and C, where the electron density ( $\rho_b$ ) was 0.0055 au and the Laplacian values ( $\Delta^2\rho_b$ ) was 0.01634 au. The relevant CH... $\pi$  interaction was also present in **iL1** simulation with 0.0067 au  $\rho_b$  and 0.02098 au  $\Delta^2\rho_b$  values.

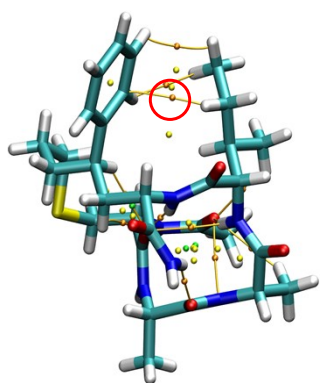

CH... $\pi$  interaction in X-ray structure

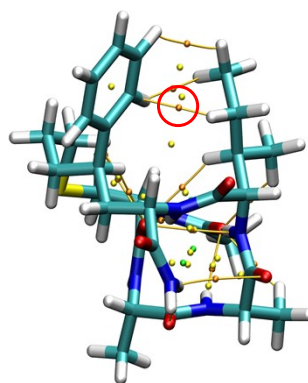

CH... $\pi$  interaction in calculated iL1 structure

**Figure S5.** AIM analyses of CH... $\pi$  interaction in conformer-**1** and calculated **iL1**.

#### 4.4 Thermodynamic correction with temperature elevation

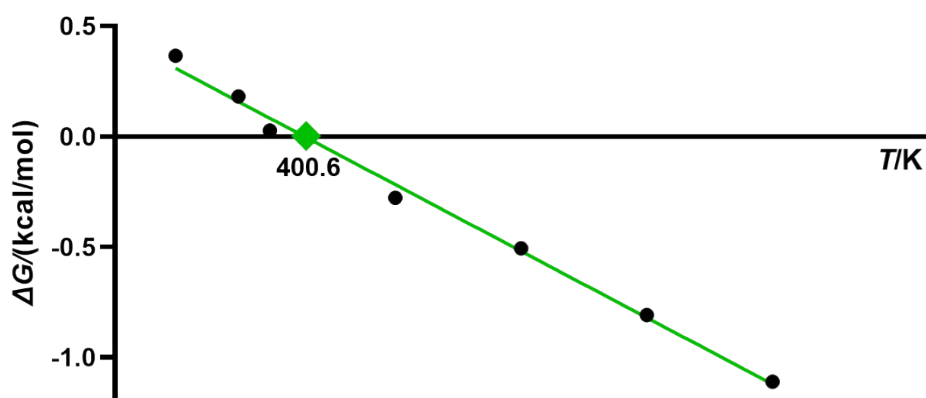

**Figure S6.** Linear regression of Gibbs energy with respect to temperature

| T/K                    | 298 | 348 | 373 | 473  | 573  | 673  | 773  |
|------------------------|-----|-----|-----|------|------|------|------|
| $\Delta G$ /(kcal/mol) | 0.4 | 0.2 | 0.0 | -0.3 | -0.5 | -0.8 | -1.1 |

The calculated critical temperature was 373 K, nonetheless the linear regression offered that the critical temperature was 400 K. The tendency of Gibbs free energy with respect to temperature was diminished, even the adequate Gibbs energy prediction was not acceptable due to the calculation model used.

## 5. Crystal data

**Table S1.** Crystal data for polymorph- $\alpha$  and polymorph- $\beta$  of **CIH<sup>Ala</sup>**

|                                               | Polymorph- $\alpha$                                             | Polymorph- $\beta$                                              |
|-----------------------------------------------|-----------------------------------------------------------------|-----------------------------------------------------------------|
| CCDC                                          | 2292337                                                         | 2292338                                                         |
| Formula                                       | C <sub>30</sub> H <sub>46</sub> N <sub>6</sub> O <sub>6</sub> S | C <sub>30</sub> H <sub>46</sub> N <sub>6</sub> O <sub>6</sub> S |
| Formula Weight                                | 618.32                                                          | 618.32                                                          |
| Crystal System                                | orthorhombic                                                    | tetragonal                                                      |
| Temperature / K                               | 100                                                             | 100                                                             |
| Wavelength/ Å                                 | 1.54184                                                         | 1.54184                                                         |
| a / Å                                         | 9.8076(2)                                                       | 10.30099(6)                                                     |
| b / Å                                         | 16.1235(3)                                                      | 10.30099(6)                                                     |
| c / Å                                         | 22.4399(4)                                                      | 63.8033(6)                                                      |
| $\alpha$ / °                                  | 90                                                              | 90                                                              |
| $\beta$ / °                                   | 90                                                              | 90                                                              |
| $\gamma$ / °                                  | 90                                                              | 90                                                              |
| Space Group                                   | P2 <sub>1</sub> 2 <sub>1</sub> 2 <sub>1</sub> #19               | P 4 <sub>1</sub> 2 <sub>1</sub> 2 #92                           |
| Z value                                       | 4                                                               | 8                                                               |
| D calc / g cm <sup>-3</sup>                   | 1.293                                                           | 1.251                                                           |
| Reflections collected                         | 19530                                                           | 41777                                                           |
| Independent reflections                       | 7110 [Rint = 0.0473, Rsigma = 0.0442]                           | 6970 [Rint = 0.0345, Rsigma = 0.0225]                           |
| F (000)                                       | 1488                                                            | 2736                                                            |
| 2 $\theta$ range for data collection/°        | 6.75 to 156.338                                                 | 5.54 to 154.038                                                 |
| Goodness-of-fit on F <sup>2</sup>             | 0.995                                                           | 1.067                                                           |
| Final R indexes [ $I \geq 2\sigma(I)$ ]       | R1 = 0.0522, wR2 = 0.1406                                       | R1 = 0.0367, wR2 = 0.0973                                       |
| Final R indexes [all data]                    | R1 = 0.0551, wR2 = 0.1427                                       | R1 = 0.0379, wR2 = 0.0980                                       |
| Largest diff. peak and hole e.Å <sup>-3</sup> | 0.90 and -0.61                                                  | 0.53 and -0.26                                                  |

**Table S2.** Crystal data for **CIH<sup>AAV</sup>** and **CIH<sup>AAL</sup>**

|                                               | <b>CIH<sup>AAV</sup></b>                                        | <b>CIH<sup>AAL</sup></b>                                        |
|-----------------------------------------------|-----------------------------------------------------------------|-----------------------------------------------------------------|
| CCDC                                          | 2292339                                                         | 2292343                                                         |
| Formula                                       | C <sub>29</sub> H <sub>44</sub> N <sub>6</sub> O <sub>6</sub> S | C <sub>30</sub> H <sub>46</sub> N <sub>6</sub> O <sub>6</sub> S |
| Formula Weight                                | 604.30                                                          | 618.32                                                          |
| Crystal System                                | orthorhombic                                                    | tetragonal                                                      |
| Temperature / K                               | 100                                                             | 100                                                             |
| Wavelength/ Å                                 | 1.54184                                                         | 1.54184                                                         |
| a / Å                                         | 9.64330(10)                                                     | 10.47390(10)                                                    |
| b / Å                                         | 16.0251(2)                                                      | 10.47390(10)                                                    |
| c / Å                                         | 22.6439(3)                                                      | 61.7275(8)                                                      |
| α / °                                         | 90                                                              | 90                                                              |
| β / °                                         | 90                                                              | 90                                                              |
| γ / °                                         | 90                                                              | 90                                                              |
| Space Group                                   | P212121 #19                                                     | P41212 #92                                                      |
| Z value                                       | 4                                                               | 8                                                               |
| D calc / g cm <sup>-3</sup>                   | 1.256                                                           | 1.214                                                           |
| Reflections collected                         | 20927                                                           | 40369                                                           |
| Independent reflections                       | 7023 [Rint = 0.0418, Rsigma = 0.0432]                           | 7029 [Rint = 0.0667, Rsigma = 0.0372]                           |
| F (000)                                       | 1396                                                            | 2656                                                            |
| 2θ range for data collection/°                | 6.758 to 153.064                                                | 5.726 to 154.154                                                |
| Goodness-of-fit on F <sup>2</sup>             | 1.033                                                           | 1.037                                                           |
| Final R indexes [I>=2σ (I)]                   | R1 = 0.0394, wR2 = 0.1031                                       | R1 = 0.0457, wR2 = 0.1075                                       |
| Final R indexes [all data]                    | R1 = 0.0412, wR2 = 0.1043                                       | R1 = 0.0529, wR2 = 0.1107                                       |
| Largest diff. peak and hole e.Å <sup>-3</sup> | 0.28 and -0.52                                                  | 0.28 and -0.28                                                  |

## 6. Crystal structures of the CIH<sup>AAV</sup> and CIH<sup>AAL</sup>

### 6.1 X-ray structure superpositions of CIH<sup>AAIa</sup> (conformer-1) / CIH<sup>AAV</sup>, and CIH<sup>AAIa</sup> (conformer-2) / CIH<sup>AAL</sup>

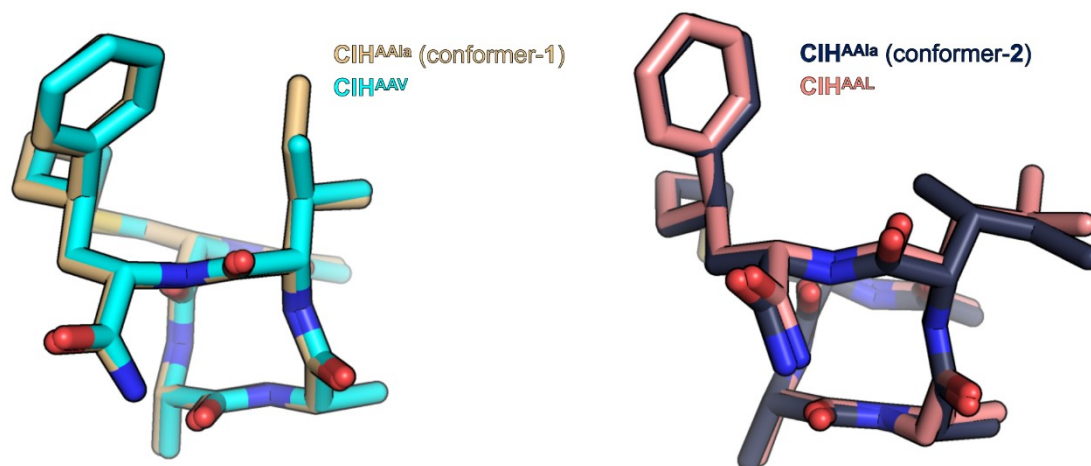

**Figure S7.** Superpositions of the single molecule X-ray structures of CIH<sup>AAIa</sup> (conformer-1) / CIH<sup>AAV</sup>, and CIH<sup>AAIa</sup> (conformer-2) / CIH<sup>AAL</sup>.

## 6.2 Crystal packing of CIH<sup>AAV</sup> and CIH<sup>AAL</sup>

Packing rules of CIH<sup>AAV</sup>

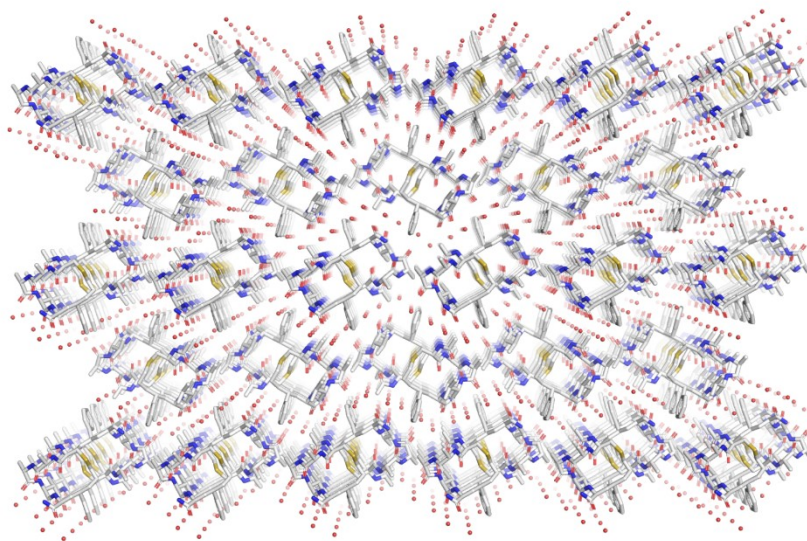

Packing rules of CIH<sup>AAL</sup>

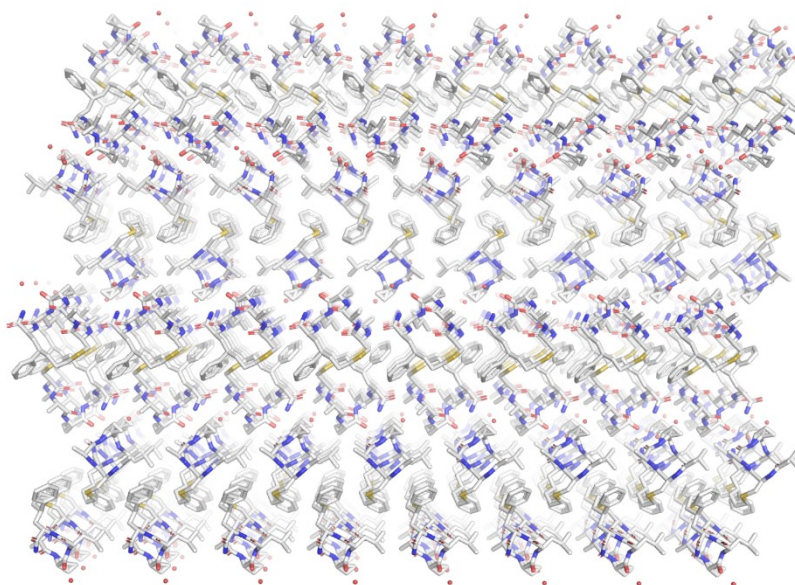

**Figure S8.** The crystal packing mode of **CIH<sup>AAV</sup>** and **CIH<sup>AAL</sup>**. The **CIH<sup>AAV</sup>** molecules packed as **CIH<sup>AAIa</sup>** in polymorph- $\alpha$ , and The **CIH<sup>AAL</sup>** molecules packed as **CIH<sup>AAIa</sup>** in polymorph- $\beta$ .

## 6.3 Temperature-dependent CD of CIH<sup>AAV</sup> and CIH<sup>AAL</sup>

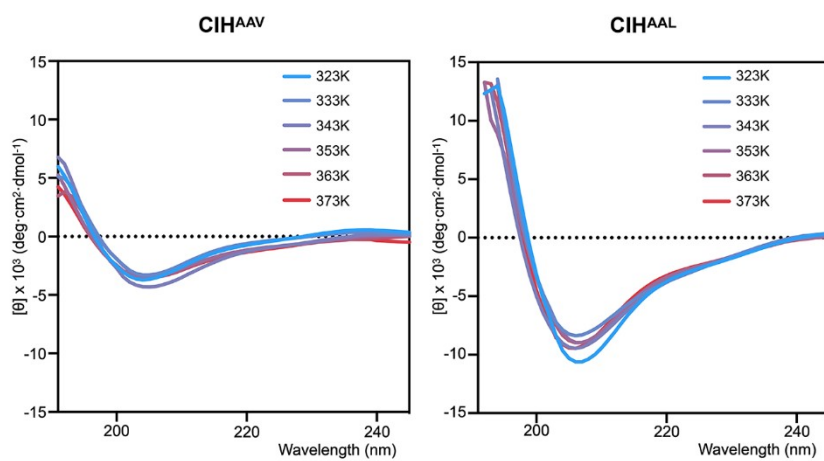

**Figure S9.** CD spectra of **CIH<sup>AAV</sup>** and **CIH<sup>AAL</sup>** in ddH<sub>2</sub>O at variable temperatures.



## 7. Cartesian Coordinates and Energy of Stationary Points

### 7.1 Energy data summary

| Structure | CH       | CG       | E            | U            | H            | G            | SP           |
|-----------|----------|----------|--------------|--------------|--------------|--------------|--------------|
| iL1       | 0.804996 | 0.679329 | -2349.097395 | -2349.051851 | -2349.050907 | -2349.176574 | -2349.14046  |
| iL2       | 0.80548  | 0.678335 | -2349.095455 | -2349.049789 | -2349.048845 | -2349.17599  | -2349.138581 |
| TS        | 0.804565 | 0.681456 | -2349.088688 | -2349.044271 | -2349.043327 | -2349.166437 | -2349.129512 |
| V1        | 0.775141 | 0.651885 | -2309.799095 | -2309.754842 | -2309.753897 | -2309.877153 | -2309.83275  |
| V2        | 0.775328 | 0.652056 | -2309.797419 | -2309.753127 | -2309.752183 | -2309.875455 | -2309.830837 |
| V3        | 0.775177 | 0.652473 | -2309.796492 | -2309.752346 | -2309.751402 | -2309.874107 | -2309.830209 |
| L1        | 0.802628 | 0.671421 | -2348.88392  | -2348.837468 | -2348.836524 | -2348.96773  | -2349.133275 |
| L2        | 0.802917 | 0.674096 | -2348.879149 | -2348.832936 | -2348.831992 | -2348.960813 | -2349.129581 |
| L3        | 0.803024 | 0.675322 | -2348.882877 | -2348.836851 | -2348.835907 | -2348.963608 | -2349.134406 |

CH = Thermal correction to Enthalpy

CG = Thermal correction to Gibbs Free Energy

E = Sum of electronic and zero-point Energies

U = Sum of electronic and thermal Energies

H = Sum of electronic and thermal Enthalpies

G = Sum of electronic and thermal Free Energies

SP = Single point energy at M06-2X (SMD, H<sub>2</sub>O)/def2-TZVPP level

## 7.2 Coordinates

iL1

Standard orientation:

| Center<br>Number | Atomic<br>Number | Atomic<br>Type | Coordinates (Angstroms) |           |           |
|------------------|------------------|----------------|-------------------------|-----------|-----------|
|                  |                  |                | X                       | Y         | Z         |
| 1                | 16               | 0              | -0.010467               | 4.138001  | -1.127066 |
| 2                | 8                | 0              | -1.729145               | -3.331267 | 0.897796  |
| 3                | 8                | 0              | 2.019310                | -1.693830 | -2.619220 |
| 4                | 8                | 0              | 0.692653                | 0.824891  | -0.547650 |
| 5                | 8                | 0              | -2.861685               | -3.212711 | -2.893092 |
| 6                | 8                | 0              | 1.640119                | -4.004924 | 0.179368  |
| 7                | 8                | 0              | 3.103985                | 0.526984  | 1.699253  |
| 8                | 7                | 0              | -0.949294               | -1.584012 | -0.318757 |
| 9                | 1                | 0              | -0.250078               | -0.853167 | -0.403695 |
| 10               | 7                | 0              | 2.658937                | 1.568214  | -1.359606 |
| 11               | 1                | 0              | 3.434414                | 2.208757  | -1.262362 |
| 12               | 7                | 0              | 3.388843                | -1.123924 | -0.905821 |
| 13               | 1                | 0              | 3.749611                | -0.366422 | -0.340191 |
| 14               | 7                | 0              | 1.491013                | -1.924274 | 1.061997  |
| 15               | 1                | 0              | 1.900645                | -0.999447 | 1.138980  |
| 16               | 7                | 0              | 3.011012                | 2.738807  | 1.256646  |
| 17               | 1                | 0              | 3.462289                | 3.639441  | 1.330956  |
| 18               | 6                | 0              | -0.899940               | -2.431050 | 0.724109  |
| 19               | 7                | 0              | -0.614372               | -3.168437 | -2.591536 |
| 20               | 1                | 0              | -0.476516               | -3.846639 | -3.326544 |
| 21               | 1                | 0              | 0.204442                | -2.721775 | -2.200027 |
| 22               | 6                | 0              | 2.640779                | -0.834185 | -1.984464 |
| 23               | 6                | 0              | -2.027056               | -1.642332 | -1.291008 |
| 24               | 1                | 0              | -2.951521               | -1.878149 | -0.762273 |
| 25               | 6                | 0              | 0.227211                | -2.193649 | 1.735258  |
| 26               | 1                | 0              | 0.314437                | -3.129126 | 2.291883  |
| 27               | 6                | 0              | 2.093185                | -2.862138 | 0.313306  |
| 28               | 6                | 0              | -1.861313               | -2.756585 | -2.325376 |
| 29               | 6                | 0              | 1.650261                | 1.599028  | -0.476016 |
| 30               | 6                | 0              | -3.768792               | 0.621628  | -0.242651 |
| 31               | 6                | 0              | 3.620226                | 1.653132  | 1.769636  |
| 32               | 6                | 0              | 2.646233                | 0.620312  | -2.465759 |
| 33               | 1                | 0              | 1.714008                | 0.740904  | -3.020146 |
| 34               | 6                | 0              | -0.101389               | -1.047714 | 2.720244  |
| 35               | 1                | 0              | -0.047351               | -0.109248 | 2.154428  |
| 36               | 6                | 0              | -2.182736               | -0.295473 | -2.008955 |

|    |   |   |           |           |           |
|----|---|---|-----------|-----------|-----------|
| 37 | 1 | 0 | -1.253834 | -0.064305 | -2.539151 |
| 38 | 1 | 0 | -2.962251 | -0.406961 | -2.765930 |
| 39 | 6 | 0 | -2.515179 | 0.864568  | -1.056855 |
| 40 | 1 | 0 | -1.687808 | 0.947406  | -0.353257 |
| 41 | 6 | 0 | 1.702049  | 2.667077  | 0.616554  |
| 42 | 1 | 0 | 0.953028  | 2.364032  | 1.349217  |
| 43 | 6 | 0 | -3.737651 | 0.763523  | 1.147073  |
| 44 | 1 | 0 | -2.804791 | 1.035426  | 1.628436  |
| 45 | 6 | 0 | -4.982128 | 0.273938  | -0.848347 |
| 46 | 1 | 0 | -5.032311 | 0.157850  | -1.925863 |
| 47 | 6 | 0 | 3.420117  | -2.469242 | -0.347540 |
| 48 | 1 | 0 | 3.552103  | -3.173899 | -1.167660 |
| 49 | 6 | 0 | 3.832779  | 0.874547  | -3.390250 |
| 50 | 1 | 0 | 3.767012  | 1.876803  | -3.818223 |
| 51 | 1 | 0 | 3.828181  | 0.150561  | -4.205993 |
| 52 | 1 | 0 | 4.777865  | 0.784352  | -2.850175 |
| 53 | 6 | 0 | 4.573113  | -2.603722 | 0.643734  |
| 54 | 1 | 0 | 5.526472  | -2.450141 | 0.134482  |
| 55 | 1 | 0 | 4.572024  | -3.603071 | 1.081715  |
| 56 | 1 | 0 | 4.484198  | -1.871431 | 1.448278  |
| 57 | 6 | 0 | -6.128194 | 0.068441  | -0.083630 |
| 58 | 1 | 0 | -7.058680 | -0.204808 | -0.570522 |
| 59 | 6 | 0 | 1.364053  | 4.064168  | 0.067222  |
| 60 | 1 | 0 | 2.222822  | 4.453997  | -0.483352 |
| 61 | 1 | 0 | 1.169645  | 4.738296  | 0.902854  |
| 62 | 6 | 0 | -1.525778 | -1.183428 | 3.279676  |
| 63 | 1 | 0 | -2.239598 | -1.212187 | 2.453483  |
| 64 | 1 | 0 | -1.615900 | -2.145435 | 3.797816  |
| 65 | 6 | 0 | -6.082394 | 0.210489  | 1.304022  |
| 66 | 1 | 0 | -6.974703 | 0.047804  | 1.899106  |
| 67 | 6 | 0 | -1.456586 | 3.690759  | -0.078095 |
| 68 | 1 | 0 | -1.201134 | 2.809786  | 0.509369  |
| 69 | 1 | 0 | -1.645589 | 4.515115  | 0.611257  |
| 70 | 6 | 0 | -2.684013 | 3.434573  | -0.954598 |
| 71 | 1 | 0 | -3.548977 | 3.351809  | -0.288813 |
| 72 | 1 | 0 | -2.869318 | 4.312586  | -1.582436 |
| 73 | 6 | 0 | -2.595887 | 2.187496  | -1.841855 |
| 74 | 1 | 0 | -1.716842 | 2.259191  | -2.489192 |
| 75 | 1 | 0 | -3.468515 | 2.158142  | -2.502731 |
| 76 | 6 | 0 | -1.924351 | -0.048694 | 4.221995  |
| 77 | 1 | 0 | -1.771325 | 0.927578  | 3.751401  |
| 78 | 1 | 0 | -1.351310 | -0.062069 | 5.151777  |
| 79 | 1 | 0 | -2.981763 | -0.124600 | 4.487996  |
| 80 | 6 | 0 | 0.943253  | -1.013783 | 3.839801  |

|    |   |   |           |           |          |
|----|---|---|-----------|-----------|----------|
| 81 | 1 | 0 | 0.854450  | -1.904421 | 4.470167 |
| 82 | 1 | 0 | 0.808338  | -0.136715 | 4.474953 |
| 83 | 1 | 0 | 1.960934  | -0.974632 | 3.451804 |
| 84 | 6 | 0 | 4.962415  | 1.861238  | 2.412699 |
| 85 | 1 | 0 | 4.920064  | 1.493622  | 3.440084 |
| 86 | 1 | 0 | 5.283123  | 2.902789  | 2.416553 |
| 87 | 1 | 0 | 5.701583  | 1.260283  | 1.877916 |
| 88 | 6 | 0 | -4.881820 | 0.560806  | 1.918181 |
| 89 | 1 | 0 | -4.831787 | 0.673972  | 2.995895 |

#####

## IL2

Standard orientation:

| Center<br>Number | Atomic<br>Number | Atomic<br>Type | Coordinates (Angstroms) |           |           |
|------------------|------------------|----------------|-------------------------|-----------|-----------|
|                  |                  |                | X                       | Y         | Z         |
| 1                | 16               | 0              | 0.487499                | 4.326534  | 0.314042  |
| 2                | 8                | 0              | -0.486569               | 1.019701  | 0.431250  |
| 3                | 8                | 0              | -1.864379               | -3.777901 | 0.741789  |
| 4                | 8                | 0              | 3.039930                | -2.603877 | 3.264074  |
| 5                | 8                | 0              | 1.742831                | -3.371850 | -0.613419 |
| 6                | 8                | 0              | -1.840933               | -1.036730 | 3.036483  |
| 7                | 7                | 0              | 0.977841                | -1.548665 | 0.505055  |
| 8                | 1                | 0              | 0.256270                | -0.838501 | 0.568966  |
| 9                | 7                | 0              | -1.554791               | -1.956759 | -0.573543 |
| 10               | 1                | 0              | -1.897797               | -1.046629 | -0.861096 |
| 11               | 8                | 0              | -3.069860               | 0.530533  | -1.585418 |
| 12               | 7                | 0              | -2.294815               | 2.046848  | 1.300755  |
| 13               | 1                | 0              | -3.030268               | 2.728735  | 1.175917  |
| 14               | 7                | 0              | -2.875703               | 2.775013  | -1.432031 |
| 15               | 1                | 0              | -3.315805               | 3.675682  | -1.555270 |
| 16               | 7                | 0              | -3.240959               | -0.588231 | 1.311573  |
| 17               | 1                | 0              | -3.549170               | 0.105105  | 0.643503  |
| 18               | 7                | 0              | 0.780645                | -2.588677 | 3.065481  |
| 19               | 1                | 0              | 0.674002                | -3.059954 | 3.951933  |
| 20               | 6                | 0              | -2.209341               | -2.647700 | 0.379609  |
| 21               | 6                | 0              | 3.977666                | 0.386235  | -0.256096 |
| 22               | 6                | 0              | -1.390057               | 1.852079  | 0.327689  |
| 23               | 6                | 0              | 2.016353                | -2.276370 | 2.650906  |
| 24               | 6                | 0              | -0.416471               | -2.559153 | -1.249763 |
| 25               | 1                | 0              | -0.629521               | -3.622587 | -1.352570 |
| 26               | 6                | 0              | 0.865271                | -2.522766 | -0.414092 |

|    |   |   |           |           |           |
|----|---|---|-----------|-----------|-----------|
| 27 | 6 | 0 | 2.792035  | 0.896606  | 0.538806  |
| 28 | 1 | 0 | 1.930468  | 0.901187  | -0.129615 |
| 29 | 6 | 0 | 2.139579  | -1.446795 | 1.371230  |
| 30 | 1 | 0 | 2.992973  | -1.862840 | 0.836522  |
| 31 | 6 | 0 | -1.510072 | 2.730210  | -0.920350 |
| 32 | 1 | 0 | -0.862804 | 2.267490  | -1.664411 |
| 33 | 6 | 0 | 3.060445  | 3.389887  | -0.097934 |
| 34 | 1 | 0 | 3.807829  | 3.111066  | -0.847286 |
| 35 | 1 | 0 | 3.390164  | 4.349353  | 0.314382  |
| 36 | 6 | 0 | -2.404967 | -0.221372 | 2.297988  |
| 37 | 6 | 0 | 2.429719  | 0.012678  | 1.741296  |
| 38 | 1 | 0 | 3.235341  | 0.019178  | 2.478243  |
| 39 | 1 | 0 | 1.549661  | 0.435102  | 2.234149  |
| 40 | 6 | 0 | -1.048197 | 4.170968  | -0.654115 |
| 41 | 1 | 0 | -1.802136 | 4.692830  | -0.060723 |
| 42 | 1 | 0 | -0.946707 | 4.695981  | -1.605240 |
| 43 | 6 | 0 | 5.134504  | -0.094385 | 0.369609  |
| 44 | 1 | 0 | 5.184917  | -0.139825 | 1.451945  |
| 45 | 6 | 0 | 3.952565  | 0.427382  | -1.654182 |
| 46 | 1 | 0 | 3.067288  | 0.802429  | -2.155784 |
| 47 | 6 | 0 | -3.562703 | 1.659179  | -1.741563 |
| 48 | 6 | 0 | 3.031051  | 2.343306  | 1.021383  |
| 49 | 1 | 0 | 2.246938  | 2.601740  | 1.738839  |
| 50 | 1 | 0 | 3.977821  | 2.378555  | 1.570195  |
| 51 | 6 | 0 | -2.230738 | 1.280986  | 2.537329  |
| 52 | 1 | 0 | -1.234061 | 1.391166  | 2.968403  |
| 53 | 6 | 0 | 5.044313  | -0.000040 | -2.408929 |
| 54 | 1 | 0 | 4.999877  | 0.041109  | -3.492336 |
| 55 | 6 | 0 | 1.729462  | 3.583724  | -0.825534 |
| 56 | 1 | 0 | 1.342090  | 2.633992  | -1.192742 |
| 57 | 1 | 0 | 1.852919  | 4.252871  | -1.678392 |
| 58 | 6 | 0 | 6.186849  | -0.481391 | -1.773005 |
| 59 | 1 | 0 | 7.037022  | -0.819410 | -2.355865 |
| 60 | 6 | 0 | -0.181976 | -1.988217 | -2.665016 |
| 61 | 1 | 0 | 0.612950  | -2.615208 | -3.083495 |
| 62 | 6 | 0 | 6.227155  | -0.526292 | -0.379500 |
| 63 | 1 | 0 | 7.111448  | -0.900309 | 0.126066  |
| 64 | 6 | 0 | -3.453468 | -1.991647 | 0.988303  |
| 65 | 1 | 0 | -3.632306 | -2.529879 | 1.918347  |
| 66 | 6 | 0 | 0.305748  | -0.538368 | -2.661475 |
| 67 | 1 | 0 | -0.445730 | 0.139105  | -2.254210 |
| 68 | 1 | 0 | 0.522605  | -0.214823 | -3.682962 |
| 69 | 1 | 0 | 1.217401  | -0.420338 | -2.075887 |
| 70 | 6 | 0 | -4.961160 | 1.838915  | -2.262622 |

|    |   |   |           |           |           |
|----|---|---|-----------|-----------|-----------|
| 71 | 1 | 0 | -5.045954 | 1.330456  | -3.225144 |
| 72 | 1 | 0 | -5.247756 | 2.883846  | -2.381032 |
| 73 | 1 | 0 | -5.654417 | 1.353248  | -1.571731 |
| 74 | 6 | 0 | -3.279115 | 1.784560  | 3.525378  |
| 75 | 1 | 0 | -3.087267 | 2.829353  | 3.777362  |
| 76 | 1 | 0 | -3.236506 | 1.195368  | 4.442059  |
| 77 | 1 | 0 | -4.284418 | 1.703030  | 3.106036  |
| 78 | 6 | 0 | -1.426718 | -2.149445 | -3.552787 |
| 79 | 1 | 0 | -2.206921 | -1.460763 | -3.213329 |
| 80 | 1 | 0 | -1.151511 | -1.818968 | -4.560032 |
| 81 | 6 | 0 | -1.985814 | -3.569224 | -3.620348 |
| 82 | 1 | 0 | -1.211620 | -4.288784 | -3.905207 |
| 83 | 1 | 0 | -2.787293 | -3.634723 | -4.361262 |
| 84 | 1 | 0 | -2.402905 | -3.892155 | -2.662694 |
| 85 | 6 | 0 | -4.655369 | -2.149074 | 0.060562  |
| 86 | 1 | 0 | -5.561704 | -1.799555 | 0.558887  |
| 87 | 1 | 0 | -4.787780 | -3.200510 | -0.199504 |
| 88 | 1 | 0 | -4.518701 | -1.577300 | -0.858619 |
| 89 | 1 | 0 | -0.051891 | -2.222036 | 2.624234  |

#####

**TS**

Standard orientation:

| Center<br>Number | Atomic<br>Number | Atomic<br>Type | Coordinates (Angstroms) |           |           |
|------------------|------------------|----------------|-------------------------|-----------|-----------|
|                  |                  |                | X                       | Y         | Z         |
| 1                | 16               | 0              | -0.601793               | 4.189691  | 0.526173  |
| 2                | 8                | 0              | -0.859881               | 0.782690  | 0.016353  |
| 3                | 8                | 0              | -1.254448               | -4.464323 | -0.153117 |
| 4                | 8                | 0              | 2.985938                | -1.273759 | 4.050804  |
| 5                | 8                | 0              | 2.398176                | -2.998474 | 0.449266  |
| 6                | 8                | 0              | -1.902053               | -1.981367 | 2.503055  |
| 7                | 7                | 0              | 1.227963                | -1.114413 | 0.893948  |
| 8                | 1                | 0              | 0.458072                | -0.502208 | 0.642966  |
| 9                | 7                | 0              | -0.845421               | -2.290481 | -0.694741 |
| 10               | 1                | 0              | -1.202922               | -1.345627 | -0.660659 |
| 11               | 8                | 0              | -3.466539               | 0.105875  | -1.871277 |
| 12               | 7                | 0              | -2.795093               | 1.220727  | 1.098146  |
| 13               | 1                | 0              | -3.667036               | 1.732574  | 1.097600  |
| 14               | 7                | 0              | -3.668009               | 2.307459  | -1.426225 |
| 15               | 1                | 0              | -4.259773               | 3.126141  | -1.431795 |
| 16               | 7                | 0              | -3.136407               | -1.527596 | 0.665317  |

|    |   |   |           |           |           |
|----|---|---|-----------|-----------|-----------|
| 17 | 1 | 0 | -3.477473 | -0.823276 | 0.019369  |
| 18 | 7 | 0 | 0.843792  | -1.830797 | 3.561330  |
| 19 | 1 | 0 | 0.708998  | -2.213993 | 4.485555  |
| 20 | 6 | 0 | -1.617485 | -3.286220 | -0.221280 |
| 21 | 6 | 0 | 3.406525  | 1.213568  | -0.175890 |
| 22 | 6 | 0 | -1.926363 | 1.402209  | 0.093459  |
| 23 | 6 | 0 | 2.033752  | -1.298468 | 3.259160  |
| 24 | 6 | 0 | 0.556716  | -2.490225 | -1.030194 |
| 25 | 1 | 0 | 0.663692  | -3.547299 | -1.262409 |
| 26 | 6 | 0 | 1.463887  | -2.235541 | 0.181701  |
| 27 | 6 | 0 | 2.280034  | 1.663904  | 0.729664  |
| 28 | 1 | 0 | 1.351490  | 1.514416  | 0.180811  |
| 29 | 6 | 0 | 2.190935  | -0.655994 | 1.881715  |
| 30 | 1 | 0 | 3.181071  | -0.956006 | 1.538405  |
| 31 | 6 | 0 | -2.291319 | 2.446753  | -0.964303 |
| 32 | 1 | 0 | -1.607525 | 2.264265  | -1.793840 |
| 33 | 6 | 0 | 2.094898  | 4.095948  | -0.128537 |
| 34 | 1 | 0 | 2.824087  | 3.928079  | -0.927815 |
| 35 | 1 | 0 | 2.225590  | 5.134048  | 0.193255  |
| 36 | 6 | 0 | -2.486683 | -1.161187 | 1.783177  |
| 37 | 6 | 0 | 2.156370  | 0.870720  | 2.041739  |
| 38 | 1 | 0 | 2.958066  | 1.140003  | 2.732940  |
| 39 | 1 | 0 | 1.216591  | 1.161950  | 2.521648  |
| 40 | 6 | 0 | -2.111407 | 3.883278  | -0.445739 |
| 41 | 1 | 0 | -2.930510 | 4.130389  | 0.232950  |
| 42 | 1 | 0 | -2.157057 | 4.572636  | -1.290495 |
| 43 | 6 | 0 | 4.676154  | 0.897946  | 0.321432  |
| 44 | 1 | 0 | 4.868391  | 0.961042  | 1.387296  |
| 45 | 6 | 0 | 3.196629  | 1.129869  | -1.556198 |
| 46 | 1 | 0 | 2.218630  | 1.375371  | -1.957046 |
| 47 | 6 | 0 | -4.160120 | 1.134453  | -1.870304 |
| 48 | 6 | 0 | 2.393985  | 3.168011  | 1.054486  |
| 49 | 1 | 0 | 1.709621  | 3.396351  | 1.877289  |
| 50 | 1 | 0 | 3.401597  | 3.377199  | 1.428114  |
| 51 | 6 | 0 | -2.514909 | 0.309463  | 2.197985  |
| 52 | 1 | 0 | -1.510498 | 0.518366  | 2.572491  |
| 53 | 6 | 0 | 4.216084  | 0.728664  | -2.417996 |
| 54 | 1 | 0 | 4.025190  | 0.660910  | -3.483861 |
| 55 | 6 | 0 | 0.704847  | 3.928447  | -0.743632 |
| 56 | 1 | 0 | 0.580704  | 2.932045  | -1.165889 |
| 57 | 1 | 0 | 0.553648  | 4.656649  | -1.542344 |
| 58 | 6 | 0 | 5.471806  | 0.403469  | -1.908251 |
| 59 | 1 | 0 | 6.266179  | 0.082405  | -2.573434 |
| 60 | 6 | 0 | 1.044776  | -1.633311 | -2.249016 |

|    |   |   |           |           |           |
|----|---|---|-----------|-----------|-----------|
| 61 | 1 | 0 | 1.737559  | -0.883934 | -1.860962 |
| 62 | 6 | 0 | 5.698817  | 0.493668  | -0.534700 |
| 63 | 1 | 0 | 6.673358  | 0.243842  | -0.128226 |
| 64 | 6 | 0 | -3.044620 | -2.904017 | 0.193249  |
| 65 | 1 | 0 | -3.284447 | -3.566188 | 1.024937  |
| 66 | 6 | 0 | -0.078079 | -0.877220 | -2.962729 |
| 67 | 1 | 0 | 1.157352  | -3.282770 | -3.634749 |
| 68 | 1 | 0 | 0.347458  | -0.314576 | -3.797780 |
| 69 | 1 | 0 | -0.576859 | -0.159073 | -2.312536 |
| 70 | 6 | 0 | -5.589917 | 1.126047  | -2.333594 |
| 71 | 1 | 0 | -5.632871 | 0.697731  | -3.336741 |
| 72 | 1 | 0 | -6.045069 | 2.116270  | -2.343398 |
| 73 | 1 | 0 | -6.166056 | 0.474949  | -1.671455 |
| 74 | 6 | 0 | -3.530440 | 0.513506  | 3.320025  |
| 75 | 1 | 0 | -3.476996 | 1.537880  | 3.692781  |
| 76 | 1 | 0 | -3.313054 | -0.166947 | 4.143110  |
| 77 | 1 | 0 | -4.545648 | 0.319274  | 2.965641  |
| 78 | 6 | 0 | 1.820920  | -2.494301 | -3.258566 |
| 79 | 1 | 0 | -0.833602 | -1.555066 | -3.368687 |
| 80 | 1 | 0 | 2.059575  | -1.858063 | -4.117468 |
| 81 | 6 | 0 | 3.114748  | -3.110844 | -2.730311 |
| 82 | 1 | 0 | 3.781483  | -2.340108 | -2.331663 |
| 83 | 1 | 0 | 3.647064  | -3.632716 | -3.530739 |
| 84 | 1 | 0 | 2.931342  | -3.829904 | -1.930621 |
| 85 | 6 | 0 | -4.018531 | -3.153715 | -0.954992 |
| 86 | 1 | 0 | -5.044208 | -2.983869 | -0.621736 |
| 87 | 1 | 0 | -3.930857 | -4.188493 | -1.288348 |
| 88 | 1 | 0 | -3.813205 | -2.495295 | -1.799724 |
| 89 | 1 | 0 | 0.048191  | -1.817124 | 2.934044  |

#####

## V1

Standard orientation:

| Center<br>Number | Atomic<br>Number | Atomic<br>Type | Coordinates (Angstroms) |           |           |
|------------------|------------------|----------------|-------------------------|-----------|-----------|
|                  |                  |                | X                       | Y         | Z         |
| 1                | 16               | 0              | -0.054640               | 4.156747  | -0.980258 |
| 2                | 8                | 0              | 0.643621                | 0.819239  | -0.443642 |
| 3                | 8                | 0              | 1.909467                | -1.699157 | -2.594222 |
| 4                | 8                | 0              | -1.818579               | -3.342515 | 0.914497  |
| 5                | 8                | 0              | -3.046317               | -3.059497 | -2.840644 |



|    |   |   |           |           |           |
|----|---|---|-----------|-----------|-----------|
| 6  | 8 | 0 | 3.092829  | 0.488655  | 1.723697  |
| 7  | 8 | 0 | 1.560376  | -4.021591 | 0.156521  |
| 8  | 7 | 0 | -1.037026 | -1.565544 | -0.257016 |
| 9  | 1 | 0 | -0.329224 | -0.841946 | -0.331766 |
| 10 | 7 | 0 | 1.420299  | -1.961385 | 1.086168  |
| 11 | 1 | 0 | 1.828922  | -1.037835 | 1.179670  |
| 12 | 7 | 0 | 2.580066  | 1.560029  | -1.326771 |
| 13 | 1 | 0 | 3.361201  | 2.197061  | -1.254530 |
| 14 | 7 | 0 | 3.301173  | -1.132295 | -0.898464 |
| 15 | 1 | 0 | 3.662190  | -0.377158 | -0.329901 |
| 16 | 7 | 0 | 3.028577  | 2.703280  | 1.292236  |
| 17 | 1 | 0 | 3.494815  | 3.596679  | 1.361651  |
| 18 | 7 | 0 | -0.791591 | -3.061873 | -2.594694 |
| 19 | 1 | 0 | -0.681185 | -3.712807 | -3.358335 |
| 20 | 1 | 0 | 0.042719  | -2.649178 | -2.199182 |
| 21 | 6 | 0 | -0.979821 | -2.448418 | 0.755875  |
| 22 | 6 | 0 | -2.024807 | -2.642849 | -2.280348 |
| 23 | 6 | 0 | 2.535077  | -0.839511 | -1.963492 |
| 24 | 6 | 0 | 1.604912  | 1.591083  | -0.406311 |
| 25 | 6 | 0 | 2.017484  | -2.883409 | 0.312243  |
| 26 | 6 | 0 | 1.702181  | 2.655354  | 0.686919  |
| 27 | 1 | 0 | 0.969067  | 2.361678  | 1.439199  |
| 28 | 6 | 0 | -2.143975 | -1.569098 | -1.197796 |
| 29 | 1 | 0 | -3.054701 | -1.813019 | -0.649503 |
| 30 | 6 | 0 | 3.629532  | 1.605816  | 1.789743  |
| 31 | 6 | 0 | 0.163035  | -2.256599 | 1.759909  |
| 32 | 1 | 0 | 0.257365  | -3.213757 | 2.276904  |
| 33 | 6 | 0 | 2.522762  | 0.617501  | -2.435832 |
| 34 | 1 | 0 | 1.569412  | 0.741958  | -2.952397 |
| 35 | 6 | 0 | -3.589090 | 0.716893  | 1.437564  |
| 36 | 1 | 0 | -2.609120 | 0.930652  | 1.851267  |
| 37 | 6 | 0 | 3.341181  | -2.480965 | -0.348917 |
| 38 | 1 | 0 | 3.472284  | -3.179651 | -1.174208 |
| 39 | 6 | 0 | 1.371017  | 4.058607  | 0.151077  |
| 40 | 1 | 0 | 2.212477  | 4.430334  | -0.437280 |
| 41 | 1 | 0 | 1.227049  | 4.736918  | 0.993482  |
| 42 | 6 | 0 | -3.745452 | 0.674248  | 0.050173  |
| 43 | 6 | 0 | 3.671506  | 0.875028  | -3.405991 |
| 44 | 1 | 0 | 3.590953  | 1.880039  | -3.824807 |
| 45 | 1 | 0 | 3.631946  | 0.156032  | -4.225087 |
| 46 | 1 | 0 | 4.637265  | 0.779237  | -2.904858 |
| 47 | 6 | 0 | -2.731944 | 3.506473  | -0.676781 |
| 48 | 1 | 0 | -2.945462 | 4.401488  | -1.270571 |
| 49 | 1 | 0 | -3.558072 | 3.411446  | 0.035315  |

|    |   |   |           |           |           |
|----|---|---|-----------|-----------|-----------|
| 50 | 6 | 0 | -0.171562 | -1.160621 | 2.795392  |
| 51 | 1 | 0 | -0.206431 | -0.204376 | 2.259919  |
| 52 | 6 | 0 | -2.307130 | -0.194392 | -1.859284 |
| 53 | 1 | 0 | -3.131730 | -0.264796 | -2.572352 |
| 54 | 1 | 0 | -1.404887 | 0.037468  | -2.433533 |
| 55 | 6 | 0 | 4.498874  | -2.617878 | 0.636339  |
| 56 | 1 | 0 | 5.449192  | -2.456456 | 0.123762  |
| 57 | 1 | 0 | 4.504080  | -3.620682 | 1.066367  |
| 58 | 1 | 0 | 4.410883  | -1.892138 | 1.446688  |
| 59 | 6 | 0 | -1.455914 | 3.730945  | 0.136025  |
| 60 | 1 | 0 | -1.190270 | 2.839776  | 0.703207  |
| 61 | 1 | 0 | -1.591717 | 4.553013  | 0.840517  |
| 62 | 6 | 0 | -1.534340 | -1.411789 | 3.444363  |
| 63 | 1 | 0 | -2.349717 | -1.426714 | 2.721856  |
| 64 | 1 | 0 | -1.751780 | -0.623501 | 4.169211  |
| 65 | 1 | 0 | -1.538165 | -2.367883 | 3.976870  |
| 66 | 6 | 0 | -2.561583 | 0.941769  | -0.854489 |
| 67 | 1 | 0 | -1.680958 | 1.009592  | -0.217971 |
| 68 | 6 | 0 | -2.705224 | 2.281936  | -1.598813 |
| 69 | 1 | 0 | -1.878318 | 2.373132  | -2.309442 |
| 70 | 1 | 0 | -3.624558 | 2.264909  | -2.193290 |
| 71 | 6 | 0 | 4.986327  | 1.789421  | 2.409430  |
| 72 | 1 | 0 | 4.954217  | 1.424523  | 3.438193  |
| 73 | 1 | 0 | 5.326447  | 2.824878  | 2.406249  |
| 74 | 1 | 0 | 5.705154  | 1.173747  | 1.863843  |
| 75 | 6 | 0 | -5.015655 | 0.394050  | -0.468093 |
| 76 | 1 | 0 | -5.161414 | 0.354971  | -1.542756 |
| 77 | 6 | 0 | -4.667092 | 0.483741  | 2.291331  |
| 78 | 1 | 0 | -4.519729 | 0.515235  | 3.365801  |
| 79 | 6 | 0 | 0.914598  | -1.087997 | 3.872145  |
| 80 | 1 | 0 | 0.988477  | -2.041096 | 4.405353  |
| 81 | 1 | 0 | 0.666002  | -0.313818 | 4.602904  |
| 82 | 1 | 0 | 1.896093  | -0.849857 | 3.462841  |
| 83 | 6 | 0 | -6.095903 | 0.159270  | 0.379134  |
| 84 | 1 | 0 | -7.072105 | -0.060633 | -0.040585 |
| 85 | 6 | 0 | -5.925587 | 0.203132  | 1.763830  |
| 86 | 1 | 0 | -6.766532 | 0.017591  | 2.423483  |

#####

V2

Standard orientation:

-----  
Center      Atomic      Atomic      Coordinates (Angstroms)

| Number | Number | Type | X         | Y         | Z         |
|--------|--------|------|-----------|-----------|-----------|
| 1      | 16     | 0    | -0.049186 | 4.182223  | -0.847866 |
| 2      | 8      | 0    | 0.651969  | 0.856687  | -0.543506 |
| 3      | 8      | 0    | 1.855267  | -1.747027 | -2.680397 |
| 4      | 8      | 0    | -2.110811 | -2.894795 | 1.310087  |
| 5      | 8      | 0    | -3.142198 | -2.817288 | -2.873162 |
| 6      | 8      | 0    | 3.214554  | 0.425153  | 1.616357  |
| 7      | 8      | 0    | 1.408587  | -4.029030 | 0.098575  |
| 8      | 7      | 0    | -1.067309 | -1.553163 | -0.199002 |
| 9      | 1      | 0    | -0.258500 | -0.969737 | -0.385584 |
| 10     | 7      | 0    | 1.364534  | -1.986493 | 1.081979  |
| 11     | 1      | 0    | 1.827756  | -1.093053 | 1.205237  |
| 12     | 7      | 0    | 2.618958  | 1.506136  | -1.434376 |
| 13     | 1      | 0    | 3.445636  | 2.080232  | -1.342785 |
| 14     | 7      | 0    | 3.230711  | -1.202976 | -0.962982 |
| 15     | 1      | 0    | 3.589278  | -0.456499 | -0.381219 |
| 16     | 7      | 0    | 3.186746  | 2.632892  | 1.136441  |
| 17     | 1      | 0    | 3.686022  | 3.511041  | 1.152928  |
| 18     | 7      | 0    | -0.914498 | -3.052527 | -2.526388 |
| 19     | 1      | 0    | -0.829873 | -3.666035 | -3.323720 |
| 20     | 1      | 0    | -0.063316 | -2.727387 | -2.090591 |
| 21     | 6      | 0    | -1.112940 | -2.263613 | 0.941515  |
| 22     | 6      | 0    | -2.114651 | -2.525605 | -2.248498 |
| 23     | 6      | 0    | 2.490603  | -0.899032 | -2.044217 |
| 24     | 6      | 0    | 1.653553  | 1.575101  | -0.503818 |
| 25     | 6      | 0    | 1.911361  | -2.913353 | 0.270751  |
| 26     | 6      | 0    | 1.827912  | 2.614934  | 0.604664  |
| 27     | 1      | 0    | 1.139257  | 2.317810  | 1.393116  |
| 28     | 6      | 0    | -2.194518 | -1.500780 | -1.115876 |
| 29     | 1      | 0    | -3.087831 | -1.764962 | -0.550844 |
| 30     | 6      | 0    | 3.784031  | 1.528706  | 1.623698  |
| 31     | 6      | 0    | 0.145688  | -2.289006 | 1.817149  |
| 32     | 1      | 0    | 0.212972  | -3.328474 | 2.142611  |
| 33     | 6      | 0    | 2.524928  | 0.553077  | -2.530712 |
| 34     | 1      | 0    | 1.575000  | 0.704048  | -3.045951 |
| 35     | 6      | 0    | -3.896039 | 0.366728  | 1.499296  |
| 36     | 1      | 0    | -2.945894 | 0.427413  | 2.017004  |
| 37     | 6      | 0    | 3.234122  | -2.551582 | -0.414281 |
| 38     | 1      | 0    | 3.324168  | -3.250940 | -1.244084 |
| 39     | 6      | 0    | 1.482352  | 4.034372  | 0.128653  |
| 40     | 1      | 0    | 2.269786  | 4.401178  | -0.533210 |
| 41     | 1      | 0    | 1.436659  | 4.696067  | 0.995152  |
| 42     | 6      | 0    | -3.945215 | 0.626027  | 0.127070  |

|    |   |   |           |           |           |
|----|---|---|-----------|-----------|-----------|
| 43 | 6 | 0 | 3.678024  | 0.757775  | -3.508360 |
| 44 | 1 | 0 | 3.631413  | 1.759423  | -3.940063 |
| 45 | 1 | 0 | 3.610263  | 0.029773  | -4.317536 |
| 46 | 1 | 0 | 4.641864  | 0.634699  | -3.009281 |
| 47 | 6 | 0 | -2.685744 | 3.520301  | -0.298305 |
| 48 | 1 | 0 | -2.952140 | 4.454722  | -0.803257 |
| 49 | 1 | 0 | -3.433352 | 3.376623  | 0.489292  |
| 50 | 6 | 0 | -0.031585 | -1.424350 | 3.083404  |
| 51 | 1 | 0 | -0.982166 | -1.758347 | 3.510172  |
| 52 | 6 | 0 | -2.368673 | -0.096690 | -1.707929 |
| 53 | 1 | 0 | -3.171661 | -0.139942 | -2.446915 |
| 54 | 1 | 0 | -1.454488 | 0.183541  | -2.239260 |
| 55 | 6 | 0 | 4.406599  | -2.736518 | 0.545879  |
| 56 | 1 | 0 | 5.350627  | -2.609555 | 0.012453  |
| 57 | 1 | 0 | 4.382505  | -3.740981 | 0.971647  |
| 58 | 1 | 0 | 4.365902  | -2.012271 | 1.360998  |
| 59 | 6 | 0 | -1.326667 | 3.684643  | 0.383295  |
| 60 | 1 | 0 | -1.011473 | 2.754089  | 0.852801  |
| 61 | 1 | 0 | -1.374313 | 4.455339  | 1.154132  |
| 62 | 6 | 0 | 1.079297  | -1.715098 | 4.094355  |
| 63 | 1 | 0 | 1.150201  | -2.783596 | 4.315388  |
| 64 | 1 | 0 | 0.886560  | -1.187696 | 5.032399  |
| 65 | 1 | 0 | 2.050960  | -1.379284 | 3.722241  |
| 66 | 6 | 0 | -2.685193 | 0.968213  | -0.644356 |
| 67 | 1 | 0 | -1.857298 | 0.969246  | 0.065302  |
| 68 | 6 | 0 | -2.760675 | 2.360285  | -1.297874 |
| 69 | 1 | 0 | -1.945877 | 2.450983  | -2.021685 |
| 70 | 1 | 0 | -3.689182 | 2.438530  | -1.871088 |
| 71 | 6 | 0 | 5.181868  | 1.685274  | 2.153883  |
| 72 | 1 | 0 | 5.213802  | 1.306546  | 3.177386  |
| 73 | 1 | 0 | 5.536810  | 2.715679  | 2.139669  |
| 74 | 1 | 0 | 5.852818  | 1.067100  | 1.552550  |
| 75 | 6 | 0 | -5.183843 | 0.532246  | -0.520506 |
| 76 | 1 | 0 | -5.248177 | 0.721596  | -1.587060 |
| 77 | 6 | 0 | -5.046992 | 0.025379  | 2.209969  |
| 78 | 1 | 0 | -4.982866 | -0.174094 | 3.274632  |
| 79 | 6 | 0 | -0.129966 | 0.075380  | 2.797015  |
| 80 | 1 | 0 | 0.835222  | 0.483220  | 2.495859  |
| 81 | 1 | 0 | -0.442747 | 0.606942  | 3.699460  |
| 82 | 1 | 0 | -0.850165 | 0.300346  | 2.010337  |
| 83 | 6 | 0 | -6.336124 | 0.192221  | 0.183395  |
| 84 | 1 | 0 | -7.285337 | 0.123860  | -0.337965 |
| 85 | 6 | 0 | -6.272394 | -0.063247 | 1.553978  |
| 86 | 1 | 0 | -7.169495 | -0.330191 | 2.102414  |

#####

V3

Standard orientation:

| Center<br>Number | Atomic<br>Number | Atomic<br>Type | Coordinates (Angstroms) |           |           |
|------------------|------------------|----------------|-------------------------|-----------|-----------|
|                  |                  |                | X                       | Y         | Z         |
| 1                | 16               | 0              | -0.112885               | 4.161978  | 0.928811  |
| 2                | 8                | 0              | -0.756026               | 0.836405  | 0.528273  |
| 3                | 8                | 0              | -2.109390               | -1.860262 | 2.510753  |
| 4                | 8                | 0              | 2.049337                | -3.186789 | -0.895698 |
| 5                | 8                | 0              | 2.917585                | -2.770099 | 3.036482  |
| 6                | 8                | 0              | -3.190879               | 0.416943  | -1.793157 |
| 7                | 8                | 0              | -1.401852               | -4.090596 | -0.222615 |
| 8                | 7                | 0              | 1.053630                | -1.489511 | 0.226336  |
| 9                | 1                | 0              | 0.288556                | -0.824516 | 0.269783  |
| 10               | 7                | 0              | -1.301497               | -2.067266 | -1.236208 |
| 11               | 1                | 0              | -1.741079               | -1.165789 | -1.377595 |
| 12               | 7                | 0              | -2.800482               | 1.420349  | 1.275935  |
| 13               | 1                | 0              | -3.628726               | 1.982182  | 1.135459  |
| 14               | 7                | 0              | -3.316031               | -1.282707 | 0.681351  |
| 15               | 1                | 0              | -3.624808               | -0.526191 | 0.083096  |
| 16               | 7                | 0              | -3.199865               | 2.618902  | -1.286886 |
| 17               | 1                | 0              | -3.697507               | 3.497078  | -1.330204 |
| 18               | 7                | 0              | 0.701362                | -2.925920 | 2.584851  |
| 19               | 1                | 0              | 0.557580                | -3.536659 | 3.375790  |
| 20               | 1                | 0              | -0.118324               | -2.582639 | 2.102845  |
| 21               | 6                | 0              | 1.121954                | -2.376408 | -0.782931 |
| 22               | 6                | 0              | 1.931909                | -2.445893 | 2.362149  |
| 23               | 6                | 0              | -2.685544               | -1.000431 | 1.834270  |
| 24               | 6                | 0              | -1.768132               | 1.534096  | 0.425787  |
| 25               | 6                | 0              | -1.901750               | -2.984625 | -0.453130 |
| 26               | 6                | 0              | -1.878823               | 2.599320  | -0.666347 |
| 27               | 1                | 0              | -1.133369               | 2.331011  | -1.412990 |
| 28               | 6                | 0              | 2.098948                | -1.425754 | 1.234951  |
| 29               | 1                | 0              | 3.042226                | -1.684382 | 0.753937  |
| 30               | 6                | 0              | -3.760801               | 1.519621  | -1.825723 |
| 31               | 6                | 0              | -0.001436               | -2.353742 | -1.829487 |
| 32               | 1                | 0              | -0.030311               | -3.377573 | -2.202898 |
| 33               | 6                | 0              | -2.776692               | 0.438674  | 2.350802  |
| 34               | 1                | 0              | -1.872489               | 0.587692  | 2.942850  |
| 35               | 6                | 0              | 3.848561                | 0.713194  | -1.359999 |

|    |   |   |           |           |           |
|----|---|---|-----------|-----------|-----------|
| 36 | 1 | 0 | 2.932630  | 0.925589  | -1.898840 |
| 37 | 6 | 0 | -3.279021 | -2.624102 | 0.114738  |
| 38 | 1 | 0 | -3.445638 | -3.334117 | 0.923354  |
| 39 | 6 | 0 | -1.585251 | 4.011068  | -0.132651 |
| 40 | 1 | 0 | -2.414885 | 4.346614  | 0.493113  |
| 41 | 1 | 0 | -1.504884 | 4.696242  | -0.978225 |
| 42 | 6 | 0 | 3.840182  | 0.738210  | 0.037455  |
| 43 | 6 | 0 | -4.005885 | 0.601966  | 3.239868  |
| 44 | 1 | 0 | -4.009334 | 1.592780  | 3.698213  |
| 45 | 1 | 0 | -3.989516 | -0.145570 | 4.033658  |
| 46 | 1 | 0 | -4.925833 | 0.477820  | 2.664068  |
| 47 | 6 | 0 | 2.570979  | 3.614636  | 0.487960  |
| 48 | 1 | 0 | 2.788174  | 4.545758  | 1.021625  |
| 49 | 1 | 0 | 3.356422  | 3.506278  | -0.267569 |
| 50 | 6 | 0 | 0.297605  | -1.432129 | -3.035702 |
| 51 | 1 | 0 | -0.487543 | -1.662827 | -3.764178 |
| 52 | 6 | 0 | 2.207953  | -0.018350 | 1.831899  |
| 53 | 1 | 0 | 2.959909  | -0.049126 | 2.623268  |
| 54 | 1 | 0 | 1.257631  | 0.247447  | 2.302991  |
| 55 | 6 | 0 | -4.362437 | -2.785803 | -0.948388 |
| 56 | 1 | 0 | -5.349231 | -2.657868 | -0.499194 |
| 57 | 1 | 0 | -4.308146 | -3.784791 | -1.384254 |
| 58 | 1 | 0 | -4.244388 | -2.051218 | -1.746376 |
| 59 | 6 | 0 | 1.240595  | 3.754908  | -0.253017 |
| 60 | 1 | 0 | 0.983829  | 2.831952  | -0.771528 |
| 61 | 1 | 0 | 1.297349  | 4.554786  | -0.992953 |
| 62 | 6 | 0 | 0.220045  | 0.061988  | -2.715478 |
| 63 | 1 | 0 | -0.789130 | 0.373131  | -2.449237 |
| 64 | 1 | 0 | 0.515173  | 0.641803  | -3.594035 |
| 65 | 1 | 0 | 0.888088  | 0.335731  | -1.898657 |
| 66 | 6 | 0 | 2.565615  | 1.056787  | 0.792905  |
| 67 | 1 | 0 | 1.756148  | 1.078065  | 0.063473  |
| 68 | 6 | 0 | 2.633695  | 2.439271  | 1.469985  |
| 69 | 1 | 0 | 1.810253  | 2.518359  | 2.185527  |
| 70 | 1 | 0 | 3.557182  | 2.506117  | 2.053603  |
| 71 | 6 | 0 | -5.121436 | 1.681226  | -2.443473 |
| 72 | 1 | 0 | -5.088782 | 1.305703  | -3.468079 |
| 73 | 1 | 0 | -5.474060 | 2.712393  | -2.447985 |
| 74 | 1 | 0 | -5.830912 | 1.062977  | -1.888097 |
| 75 | 6 | 0 | 5.036389  | 0.463853  | 0.712360  |
| 76 | 1 | 0 | 5.057137  | 0.476286  | 1.797051  |
| 77 | 6 | 0 | 5.012990  | 0.416436  | -2.068776 |
| 78 | 1 | 0 | 4.993254  | 0.399568  | -3.153528 |
| 79 | 6 | 0 | 1.645786  | -1.784441 | -3.670464 |

|    |   |   |          |           |           |
|----|---|---|----------|-----------|-----------|
| 80 | 1 | 0 | 2.480764 | -1.502648 | -3.024330 |
| 81 | 1 | 0 | 1.761043 | -1.244979 | -4.613741 |
| 82 | 1 | 0 | 1.728207 | -2.853884 | -3.879742 |
| 83 | 6 | 0 | 6.201872 | 0.166899  | 0.010287  |
| 84 | 1 | 0 | 7.117305 | -0.046980 | 0.552299  |
| 85 | 6 | 0 | 6.194544 | 0.139579  | -1.385039 |
| 86 | 1 | 0 | 7.101699 | -0.095330 | -1.931568 |

#####

**L1**

Standard orientation:

| Center<br>Number | Atomic<br>Number | Atomic<br>Type | Coordinates (Angstroms) |           |           |
|------------------|------------------|----------------|-------------------------|-----------|-----------|
|                  |                  |                | X                       | Y         | Z         |
| 1                | 16               | 0              | -0.402862               | 4.376159  | -0.279222 |
| 2                | 8                | 0              | 0.587944                | 1.082787  | -0.638484 |
| 3                | 8                | 0              | -3.167965               | -2.402994 | -3.436440 |
| 4                | 7                | 0              | 1.545803                | -2.052092 | 0.439926  |
| 5                | 1                | 0              | 1.913712                | -1.152311 | 0.729863  |
| 6                | 7                | 0              | -1.061152               | -1.490181 | -0.640546 |
| 7                | 1                | 0              | -0.373462               | -0.743505 | -0.639480 |
| 8                | 7                | 0              | 2.937236                | 2.694076  | 1.451099  |
| 9                | 1                | 0              | 3.390940                | 3.587421  | 1.581897  |
| 10               | 8                | 0              | -1.717510               | -3.471078 | 0.254067  |
| 11               | 7                | 0              | 2.542238                | 1.991877  | -1.311468 |
| 12               | 1                | 0              | 3.319003                | 2.599267  | -1.087318 |
| 13               | 8                | 0              | 1.797484                | -3.874036 | -0.885962 |
| 14               | 8                | 0              | 3.039567                | 0.453364  | 1.738563  |
| 15               | 7                | 0              | 3.356674                | -0.728359 | -1.371018 |
| 16               | 1                | 0              | 3.699651                | -0.079110 | -0.675160 |
| 17               | 7                | 0              | -0.909085               | -2.432221 | -3.257418 |
| 18               | 1                | 0              | -0.813921               | -2.890525 | -4.152047 |
| 19               | 8                | 0              | 2.059154                | -0.998689 | -3.212836 |
| 20               | 6                | 0              | 1.539647                | 1.841055  | -0.427640 |
| 21               | 6                | 0              | -2.888501               | 0.984430  | -0.556160 |
| 22               | 1                | 0              | -2.031691               | 0.931282  | 0.118612  |
| 23               | 6                | 0              | -2.136425               | -2.123868 | -2.813715 |
| 24               | 6                | 0              | -4.097603               | 0.476007  | 0.215211  |
| 25               | 6                | 0              | -5.357300               | 0.362345  | -0.390854 |
| 26               | 1                | 0              | -5.480597               | 0.633156  | -1.435047 |
| 27               | 6                | 0              | -2.240673               | -1.356072 | -1.487912 |

|    |   |   |           |           |           |
|----|---|---|-----------|-----------|-----------|
| 28 | 1 | 0 | -3.083056 | -1.807904 | -0.962423 |
| 29 | 6 | 0 | 1.600522  | 2.669513  | 0.863811  |
| 30 | 1 | 0 | 0.921831  | 2.166578  | 1.553974  |
| 31 | 6 | 0 | -3.055036 | 2.458502  | -0.997056 |
| 32 | 1 | 0 | -2.269012 | 2.694464  | -1.720639 |
| 33 | 1 | 0 | -4.002784 | 2.564090  | -1.535162 |
| 34 | 6 | 0 | -2.557466 | 0.119086  | -1.791056 |
| 35 | 1 | 0 | -3.394907 | 0.136945  | -2.493015 |
| 36 | 1 | 0 | -1.701734 | 0.562103  | -2.309577 |
| 37 | 6 | 0 | -0.896156 | -2.550561 | 0.177217  |
| 38 | 6 | 0 | 0.342467  | -2.561960 | 1.088947  |
| 39 | 1 | 0 | 0.497409  | -3.616463 | 1.318252  |
| 40 | 6 | 0 | 2.619873  | -0.259140 | -2.396854 |
| 41 | 6 | 0 | -3.017477 | 3.488390  | 0.142556  |
| 42 | 1 | 0 | -3.333113 | 4.462458  | -0.247398 |
| 43 | 1 | 0 | -3.754466 | 3.221138  | 0.908112  |
| 44 | 6 | 0 | 2.552282  | 1.265988  | -2.578131 |
| 45 | 1 | 0 | 1.605463  | 1.445407  | -3.090483 |
| 46 | 6 | 0 | 2.185824  | -2.762482 | -0.509711 |
| 47 | 6 | 0 | 1.143183  | 4.127926  | 0.661259  |
| 48 | 1 | 0 | 1.898820  | 4.673506  | 0.091079  |
| 49 | 1 | 0 | 1.058619  | 4.604381  | 1.639931  |
| 50 | 6 | 0 | -3.981390 | 0.113644  | 1.562474  |
| 51 | 1 | 0 | -3.014207 | 0.189802  | 2.050884  |
| 52 | 6 | 0 | 3.558464  | 1.572175  | 1.874103  |
| 53 | 6 | 0 | -6.460991 | -0.094310 | 0.326969  |
| 54 | 1 | 0 | -7.426036 | -0.174443 | -0.163565 |
| 55 | 6 | 0 | -1.667527 | 3.643659  | 0.851150  |
| 56 | 1 | 0 | -1.297648 | 2.681306  | 1.204227  |
| 57 | 1 | 0 | -1.770037 | 4.303293  | 1.714729  |
| 58 | 6 | 0 | -6.329520 | -0.448452 | 1.670769  |
| 59 | 1 | 0 | -7.189267 | -0.803504 | 2.229662  |
| 60 | 6 | 0 | 0.040054  | -1.779216 | 2.378440  |
| 61 | 1 | 0 | -0.960119 | -2.070044 | 2.716772  |
| 62 | 1 | 0 | -0.010413 | -0.713209 | 2.130895  |
| 63 | 6 | 0 | -5.084061 | -0.343140 | 2.286663  |
| 64 | 1 | 0 | -4.967308 | -0.616686 | 3.330607  |
| 65 | 6 | 0 | 3.704173  | 1.752075  | -3.457724 |
| 66 | 1 | 0 | 3.582566  | 2.813367  | -3.684653 |
| 67 | 1 | 0 | 3.710266  | 1.199357  | -4.398242 |
| 68 | 1 | 0 | 4.668528  | 1.607462  | -2.964670 |
| 69 | 6 | 0 | 1.036266  | -1.992126 | 3.534220  |
| 70 | 1 | 0 | 2.044606  | -1.763297 | 3.171258  |
| 71 | 6 | 0 | 4.913475  | 1.743478  | 2.509388  |



|    |   |   |           |           |           |
|----|---|---|-----------|-----------|-----------|
| 72 | 1 | 0 | 5.649286  | 1.182005  | 1.928818  |
| 73 | 1 | 0 | 4.888216  | 1.311809  | 3.512478  |
| 74 | 1 | 0 | 5.232092  | 2.783973  | 2.576486  |
| 75 | 6 | 0 | 3.472243  | -2.156923 | -1.097889 |
| 76 | 1 | 0 | 3.613261  | -2.669358 | -2.049193 |
| 77 | 6 | 0 | 1.028079  | -3.434155 | 4.052350  |
| 78 | 1 | 0 | 0.032785  | -3.714317 | 4.414883  |
| 79 | 1 | 0 | 1.728906  | -3.550333 | 4.884473  |
| 80 | 1 | 0 | 1.316766  | -4.154962 | 3.282732  |
| 81 | 6 | 0 | 0.719767  | -1.008355 | 4.666627  |
| 82 | 1 | 0 | 1.425475  | -1.121402 | 5.495030  |
| 83 | 1 | 0 | -0.287541 | -1.174983 | 5.064231  |
| 84 | 1 | 0 | 0.774645  | 0.028448  | 4.321385  |
| 85 | 6 | 0 | 4.668181  | -2.431698 | -0.185455 |
| 86 | 1 | 0 | 5.594304  | -2.130262 | -0.679306 |
| 87 | 1 | 0 | 4.729722  | -3.498450 | 0.037377  |
| 88 | 1 | 0 | 4.581206  | -1.886155 | 0.756979  |
| 89 | 1 | 0 | -0.068590 | -2.161779 | -2.767961 |

#####

## L2

Standard orientation:

| Center<br>Number | Atomic<br>Number | Atomic<br>Type | Coordinates (Angstroms) |           |           |
|------------------|------------------|----------------|-------------------------|-----------|-----------|
|                  |                  |                | X                       | Y         | Z         |
| 1                | 16               | 0              | 0.001164                | 4.435173  | -0.105600 |
| 2                | 8                | 0              | 0.816169                | 1.077016  | -0.502799 |
| 3                | 8                | 0              | -2.901197               | -2.463968 | -3.399915 |
| 4                | 7                | 0              | 1.651255                | -2.156189 | 0.466923  |
| 5                | 1                | 0              | 2.033033                | -1.292760 | 0.839738  |
| 6                | 7                | 0              | -0.923384               | -1.459250 | -0.562920 |
| 7                | 1                | 0              | -0.216969               | -0.732931 | -0.502724 |
| 8                | 7                | 0              | 2.994374                | 2.447159  | 1.905640  |
| 9                | 1                | 0              | 3.477896                | 3.301737  | 2.143793  |
| 10               | 8                | 0              | -1.603119               | -3.517365 | 0.101438  |
| 11               | 7                | 0              | 2.840375                | 1.968033  | -0.953395 |
| 12               | 1                | 0              | 3.602641                | 2.552152  | -0.637204 |
| 13               | 8                | 0              | 1.910919                | -3.894731 | -0.966180 |
| 14               | 8                | 0              | 2.971456                | 0.188228  | 2.034072  |
| 15               | 7                | 0              | 3.585021                | -0.771682 | -1.174686 |
| 16               | 1                | 0              | 3.949736                | -0.184661 | -0.436219 |

|    |   |   |           |           |           |
|----|---|---|-----------|-----------|-----------|
| 17 | 7 | 0 | -0.646153 | -2.428955 | -3.182823 |
| 18 | 1 | 0 | -0.523803 | -2.941619 | -4.043943 |
| 19 | 8 | 0 | 2.341344  | -0.854291 | -3.070905 |
| 20 | 6 | 0 | 1.764843  | 1.792727  | -0.165807 |
| 21 | 6 | 0 | -2.650134 | 1.129563  | -0.758879 |
| 22 | 1 | 0 | -1.931386 | 1.018057  | 0.056714  |
| 23 | 6 | 0 | -1.888478 | -2.130274 | -2.774084 |
| 24 | 6 | 0 | -4.023205 | 0.778683  | -0.202860 |
| 25 | 6 | 0 | -5.153427 | 0.717060  | -1.031091 |
| 26 | 1 | 0 | -5.054305 | 0.907458  | -2.095155 |
| 27 | 6 | 0 | -2.031966 | -1.286892 | -1.497337 |
| 28 | 1 | 0 | -2.944613 | -1.647354 | -1.020463 |
| 29 | 6 | 0 | 1.732345  | 2.539569  | 1.176153  |
| 30 | 1 | 0 | 0.953164  | 2.040199  | 1.753431  |
| 31 | 6 | 0 | -2.587961 | 2.597080  | -1.249156 |
| 32 | 1 | 0 | -1.657361 | 2.737746  | -1.806878 |
| 33 | 1 | 0 | -3.399947 | 2.765773  | -1.964458 |
| 34 | 6 | 0 | -2.207478 | 0.188034  | -1.899618 |
| 35 | 1 | 0 | -2.937116 | 0.222634  | -2.712398 |
| 36 | 1 | 0 | -1.262062 | 0.550964  | -2.312833 |
| 37 | 6 | 0 | -0.783436 | -2.592816 | 0.155165  |
| 38 | 6 | 0 | 0.442448  | -2.707371 | 1.077046  |
| 39 | 1 | 0 | 0.589500  | -3.782049 | 1.197234  |
| 40 | 6 | 0 | 2.909880  | -0.199900 | -2.190457 |
| 41 | 6 | 0 | -2.675996 | 3.655586  | -0.138776 |
| 42 | 1 | 0 | -2.850073 | 4.637443  | -0.593003 |
| 43 | 1 | 0 | -3.551266 | 3.460229  | 0.490179  |
| 44 | 6 | 0 | 2.929084  | 1.335895  | -2.266947 |
| 45 | 1 | 0 | 2.039744  | 1.598484  | -2.842631 |
| 46 | 6 | 0 | 2.309121  | -2.819437 | -0.504169 |
| 47 | 6 | 0 | 1.382534  | 4.033293  | 1.020636  |
| 48 | 1 | 0 | 2.237165  | 4.568857  | 0.599978  |
| 49 | 1 | 0 | 1.185187  | 4.451069  | 2.009598  |
| 50 | 6 | 0 | -4.196331 | 0.531867  | 1.163937  |
| 51 | 1 | 0 | -3.335728 | 0.575762  | 1.823863  |
| 52 | 6 | 0 | 3.518980  | 1.267992  | 2.303065  |
| 53 | 6 | 0 | -6.410545 | 0.416799  | -0.510015 |
| 54 | 1 | 0 | -7.270403 | 0.373257  | -1.171155 |
| 55 | 6 | 0 | -1.458115 | 3.738533  | 0.788076  |
| 56 | 1 | 0 | -1.189899 | 2.754814  | 1.172500  |
| 57 | 1 | 0 | -1.672966 | 4.387009  | 1.639176  |
| 58 | 6 | 0 | -6.566637 | 0.173222  | 0.855550  |
| 59 | 1 | 0 | -7.545491 | -0.060809 | 1.261347  |
| 60 | 6 | 0 | 0.246836  | -2.082092 | 2.473197  |

|    |   |   |           |           |           |
|----|---|---|-----------|-----------|-----------|
| 61 | 1 | 0 | 0.056977  | -1.007675 | 2.375233  |
| 62 | 1 | 0 | 1.215549  | -2.178460 | 2.972270  |
| 63 | 6 | 0 | -5.453776 | 0.232762  | 1.691815  |
| 64 | 1 | 0 | -5.560960 | 0.045991  | 2.755716  |
| 65 | 6 | 0 | 4.174888  | 1.824782  | -3.004797 |
| 66 | 1 | 0 | 4.119851  | 2.904210  | -3.161701 |
| 67 | 1 | 0 | 4.241393  | 1.340854  | -3.980375 |
| 68 | 1 | 0 | 5.084366  | 1.598620  | -2.443134 |
| 69 | 6 | 0 | -0.834743 | -2.734636 | 3.363335  |
| 70 | 1 | 0 | -0.886402 | -3.800689 | 3.110103  |
| 71 | 6 | 0 | 4.809553  | 1.326566  | 3.078573  |
| 72 | 1 | 0 | 5.594241  | 0.839652  | 2.493990  |
| 73 | 1 | 0 | 4.689476  | 0.759552  | 4.003957  |
| 74 | 1 | 0 | 5.125296  | 2.342202  | 3.318188  |
| 75 | 6 | 0 | 3.636925  | -2.218308 | -0.996547 |
| 76 | 1 | 0 | 3.806512  | -2.672936 | -1.972411 |
| 77 | 6 | 0 | -2.226813 | -2.123908 | 3.160089  |
| 78 | 1 | 0 | -2.221592 | -1.060426 | 3.421426  |
| 79 | 1 | 0 | -2.962853 | -2.618449 | 3.801594  |
| 80 | 1 | 0 | -2.579344 | -2.214966 | 2.131662  |
| 81 | 6 | 0 | -0.427457 | -2.622858 | 4.838508  |
| 82 | 1 | 0 | -1.179704 | -3.076445 | 5.490884  |
| 83 | 1 | 0 | -0.320019 | -1.574007 | 5.137069  |
| 84 | 1 | 0 | 0.526987  | -3.122295 | 5.029724  |
| 85 | 6 | 0 | 4.776752  | -2.594745 | -0.048793 |
| 86 | 1 | 0 | 5.735983  | -2.293271 | -0.474720 |
| 87 | 1 | 0 | 4.793244  | -3.675171 | 0.104808  |
| 88 | 1 | 0 | 4.657283  | -2.109566 | 0.922965  |
| 89 | 1 | 0 | 0.179283  | -2.124532 | -2.687860 |

#####

**L3**

Standard orientation:

| Center<br>Number | Atomic<br>Number | Atomic<br>Type | Coordinates (Angstroms) |           |           |
|------------------|------------------|----------------|-------------------------|-----------|-----------|
|                  |                  |                | X                       | Y         | Z         |
| 1                | 16               | 0              | 0.099126                | 4.375432  | -0.401007 |
| 2                | 8                | 0              | 0.863564                | 1.007437  | -0.543962 |
| 3                | 8                | 0              | -2.821867               | -2.456664 | -3.513910 |
| 4                | 7                | 0              | 1.536535                | -2.123313 | 0.685568  |
| 5                | 1                | 0              | 1.936777                | -1.232443 | 0.960736  |
| 6                | 7                | 0              | -0.943774               | -1.438457 | -0.605620 |

|    |   |   |           |           |           |
|----|---|---|-----------|-----------|-----------|
| 7  | 1 | 0 | -0.227595 | -0.720743 | -0.553681 |
| 8  | 7 | 0 | 3.070885  | 2.517271  | 1.762758  |
| 9  | 1 | 0 | 3.558349  | 3.383787  | 1.943469  |
| 10 | 8 | 0 | -1.737035 | -3.397460 | 0.217945  |
| 11 | 7 | 0 | 2.931062  | 1.772403  | -1.030838 |
| 12 | 1 | 0 | 3.716354  | 2.343155  | -0.747941 |
| 13 | 8 | 0 | 1.780200  | -4.025667 | -0.524881 |
| 14 | 8 | 0 | 3.021414  | 0.274775  | 2.062961  |
| 15 | 7 | 0 | 3.584062  | -0.997237 | -0.984858 |
| 16 | 1 | 0 | 3.935117  | -0.356653 | -0.285100 |
| 17 | 7 | 0 | -0.581368 | -2.491136 | -3.175749 |
| 18 | 1 | 0 | -0.431547 | -3.007303 | -4.030526 |
| 19 | 8 | 0 | 2.385769  | -1.216893 | -2.899191 |
| 20 | 6 | 0 | 1.837255  | 1.709161  | -0.251358 |
| 21 | 6 | 0 | -2.606349 | 1.144311  | -0.867008 |
| 22 | 1 | 0 | -1.861211 | 1.054589  | -0.073392 |
| 23 | 6 | 0 | -1.833008 | -2.145765 | -2.839373 |
| 24 | 6 | 0 | -3.955859 | 0.791152  | -0.258360 |
| 25 | 6 | 0 | -5.117317 | 0.733385  | -1.042526 |
| 26 | 1 | 0 | -5.058793 | 0.932412  | -2.108091 |
| 27 | 6 | 0 | -2.019063 | -1.287197 | -1.579356 |
| 28 | 1 | 0 | -2.942686 | -1.646955 | -1.123542 |
| 29 | 6 | 0 | 1.813621  | 2.567173  | 1.021473  |
| 30 | 1 | 0 | 1.023621  | 2.133394  | 1.635988  |
| 31 | 6 | 0 | -2.570291 | 2.600951  | -1.389981 |
| 32 | 1 | 0 | -1.668357 | 2.729441  | -1.995768 |
| 33 | 1 | 0 | -3.415459 | 2.755963  | -2.068672 |
| 34 | 6 | 0 | -2.190918 | 0.182650  | -2.002083 |
| 35 | 1 | 0 | -2.933009 | 0.210012  | -2.803866 |
| 36 | 1 | 0 | -1.248716 | 0.533944  | -2.433241 |
| 37 | 6 | 0 | -0.890553 | -2.496109 | 0.229565  |
| 38 | 6 | 0 | 0.253398  | -2.521877 | 1.259031  |
| 39 | 1 | 0 | 0.331120  | -3.564791 | 1.566166  |
| 40 | 6 | 0 | 2.950946  | -0.500639 | -2.065526 |
| 41 | 6 | 0 | -2.604134 | 3.685494  | -0.301857 |
| 42 | 1 | 0 | -2.786511 | 4.657448  | -0.773736 |
| 43 | 1 | 0 | -3.455497 | 3.515016  | 0.366315  |
| 44 | 6 | 0 | 3.013653  | 1.020584  | -2.280079 |
| 45 | 1 | 0 | 2.136603  | 1.254095  | -2.886153 |
| 46 | 6 | 0 | 2.204175  | -2.919780 | -0.170951 |
| 47 | 6 | 0 | 1.491114  | 4.047558  | 0.735600  |
| 48 | 1 | 0 | 2.350169  | 4.524560  | 0.257710  |
| 49 | 1 | 0 | 1.316662  | 4.556422  | 1.685569  |
| 50 | 6 | 0 | -4.074517 | 0.531191  | 1.112143  |

|    |   |   |           |           |           |
|----|---|---|-----------|-----------|-----------|
| 51 | 1 | 0 | -3.189505 | 0.572053  | 1.740238  |
| 52 | 6 | 0 | 3.578457  | 1.366421  | 2.254350  |
| 53 | 6 | 0 | -6.352567 | 0.426064  | -0.475459 |
| 54 | 1 | 0 | -7.237643 | 0.386599  | -1.102702 |
| 55 | 6 | 0 | -1.351722 | 3.780980  | 0.576216  |
| 56 | 1 | 0 | -1.101731 | 2.813442  | 1.010711  |
| 57 | 1 | 0 | -1.518422 | 4.484520  | 1.393932  |
| 58 | 6 | 0 | -6.454677 | 0.170437  | 0.893037  |
| 59 | 1 | 0 | -7.416581 | -0.068515 | 1.334876  |
| 60 | 6 | 0 | -0.054562 | -1.632661 | 2.478190  |
| 61 | 1 | 0 | -0.075708 | -0.588718 | 2.147822  |
| 62 | 1 | 0 | 0.791230  | -1.724508 | 3.169021  |
| 63 | 6 | 0 | -5.310094 | 0.224517  | 1.685732  |
| 64 | 1 | 0 | -5.375317 | 0.028233  | 2.751282  |
| 65 | 6 | 0 | 4.278040  | 1.406000  | -3.047176 |
| 66 | 1 | 0 | 4.254059  | 2.467688  | -3.301953 |
| 67 | 1 | 0 | 4.337851  | 0.833090  | -3.973696 |
| 68 | 1 | 0 | 5.176718  | 1.207494  | -2.458333 |
| 69 | 6 | 0 | -1.354545 | -1.949854 | 3.237038  |
| 70 | 1 | 0 | -2.196253 | -1.856728 | 2.540134  |
| 71 | 6 | 0 | 4.864138  | 1.471580  | 3.032402  |
| 72 | 1 | 0 | 5.652258  | 0.950519  | 2.482726  |
| 73 | 1 | 0 | 4.738828  | 0.961926  | 3.989804  |
| 74 | 1 | 0 | 5.178144  | 2.500280  | 3.210528  |
| 75 | 6 | 0 | 3.571506  | -2.422555 | -0.671846 |
| 76 | 1 | 0 | 3.749727  | -2.971758 | -1.596156 |
| 77 | 6 | 0 | -1.557254 | -0.914165 | 4.349381  |
| 78 | 1 | 0 | -0.748536 | -0.966146 | 5.086691  |
| 79 | 1 | 0 | -2.499156 | -1.085426 | 4.878632  |
| 80 | 1 | 0 | -1.578455 | 0.104784  | 3.951056  |
| 81 | 6 | 0 | -1.368635 | -3.370658 | 3.813521  |
| 82 | 1 | 0 | -2.277413 | -3.540804 | 4.398627  |
| 83 | 1 | 0 | -0.511936 | -3.533369 | 4.477003  |
| 84 | 1 | 0 | -1.337380 | -4.132745 | 3.031607  |
| 85 | 6 | 0 | 4.667880  | -2.755588 | 0.340962  |
| 86 | 1 | 0 | 5.649962  | -2.528196 | -0.078876 |
| 87 | 1 | 0 | 4.637234  | -3.818589 | 0.586494  |
| 88 | 1 | 0 | 4.540264  | -2.183821 | 1.263159  |
| 89 | 1 | 0 | 0.229489  | -2.191040 | -2.653490 |

-----  
#####



## References

1. Hu, K.; Geng, H.; Zhang, Q.; Liu, Q.; Xie, M.; Sun, C.; Li, W.; Lin, H.; Jiang, F.; Wang, T.; Wu, Y. D.; Li, Z., An In-tether Chiral Center Modulates the Helicity, Cell Permeability, and Target Binding Affinity of a Peptide. *Angew Chem Int Ed Engl* **2016**, *55* (28), 8013-7.
